# Supplementary material
Source: PubMed Central journal article supplement (PMC4607131)
Supplement: JCI82249sd.pdf [file JCI82249sd.pdf]

## **Supplemental Materials:**

### Supplemental Figures 1 – 7

**Supplemental Figure 1:** Sorting strategy for new emigrant/transitional and mature naïve B cells before and after gene therapy.

**Supplemental Figure 2:** ~~New emigrant/transitional and mature naïve B cells B cell IgH repertoire abnormalities in WAS patients are corrected after gene therapy.~~ IgH repertoire characteristics of new emigrant/transitional and mature naïve B cells from WAS patients, before and after gene therapy.

**Supplemental Figure 3:** Increased BCR-induced B cell activation in WAS patients.

**Supplemental Figure 4:** Increased IgM cell surface expression on mature naïve B cells from WAS patients.

**Supplemental Figure 5:** ~~The peripheral B cell tolerance checkpoint is defective in WAS patients.~~ Frequency of polyreactive antibodies among mature naïve B cells from WAS patients.

**Supplemental Figure 6:** Altered Treg phenotype in WAS patients.

**Supplemental Figure 7:** ~~Mature naïve B cells from WAS patients post-GT express normal frequencies of polyreactive antibodies.~~ Frequency of polyreactive antibodies among mature naïve B cells from WAS patients after gene therapy.

### Supplemental Tables 1- 19

**Table S1:** Description of WAS patients treated by LV-mediated HSC-GT

**Table S2:** Repertoire and reactivity of antibodies from new emigrant B cells of HD30

**Table S3:** Repertoire and reactivity of antibodies from new emigrant B cells of WAS patient 1 before GT

**Table S4:** Repertoire and reactivity of antibodies from new emigrant B cells of WAS patient 2 before GT

**Table S5:** Repertoire and reactivity of antibodies from new emigrant B cells of WAS patient 3 before GT

**Table S6:** Repertoire and reactivity of antibodies from new emigrant B cells of WAS patient 4 before GT

**Table S7:** Repertoire and reactivity of antibodies from mature naïve B cells of HD30

**Table S8:** Repertoire and reactivity of antibodies from mature naïve B cells of WAS

patient 1 before GT

**Table S9:** Repertoire and reactivity of antibodies from mature naïve B cells of WAS patient 2 before GT

**Table S10:** Repertoire and reactivity of antibodies from mature naïve B cells of WAS patient 3 before GT

**Table S11:** Repertoire and reactivity of antibodies from mature naïve B cells of WAS patient 4 before GT

**Table S12:** Repertoire and reactivity of antibodies from new emigrant B cells of WAS patient 1 after GT

**Table S13:** Repertoire and reactivity of antibodies from new emigrant B cells of WAS patient 2 after GT

**Table S14:** Repertoire and reactivity of antibodies from new emigrant B cells of WAS patient 3 after GT

**Table S15:** Repertoire and reactivity of antibodies from new emigrant B cells of WAS patient 4 after GT

**Table S16:** Repertoire and reactivity of antibodies from mature naïve B cells of WAS patient 1 after GT

**Table S17:** Repertoire and reactivity of antibodies from mature naïve B cells of WAS patient 2 after GT

**Table S18:** Repertoire and reactivity of antibodies from mature naïve B cells of WAS patient 3 after GT

**Table S19:** Repertoire and reactivity of antibodies from mature naïve B cells of WAS patient 4 after GT

## Supplemental figures

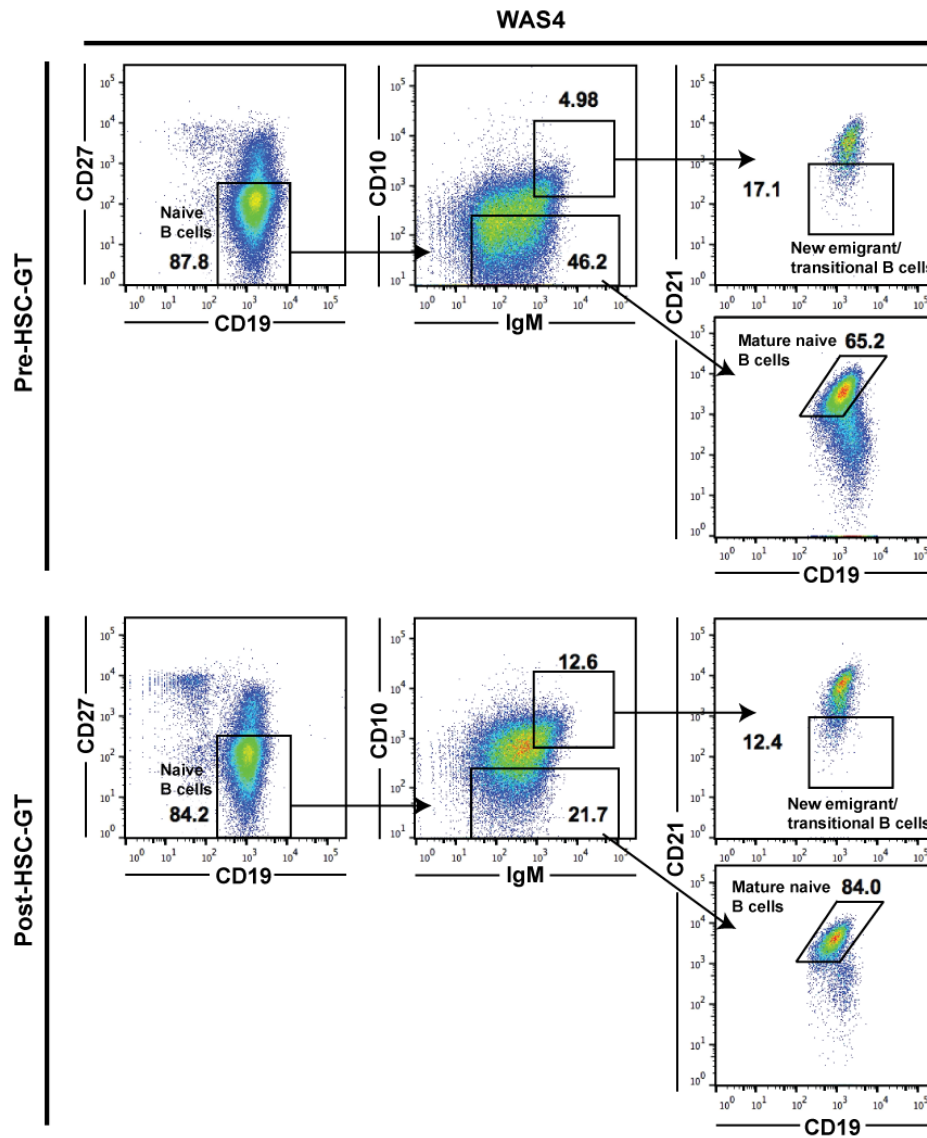

## Supplemental Figure 1

Sorting strategy for new emigrant/transitional and mature naive B cells before and after gene therapy. CD19<sup>+</sup>CD27<sup>-</sup> naive B cells were first gated and further divided into new emigrant/transitional (IgM<sup>hi</sup>CD10<sup>hi</sup>CD21<sup>low</sup>) and mature naive (IgM<sup>+</sup>CD10<sup>-</sup>CD21<sup>+</sup>) B cell subsets.

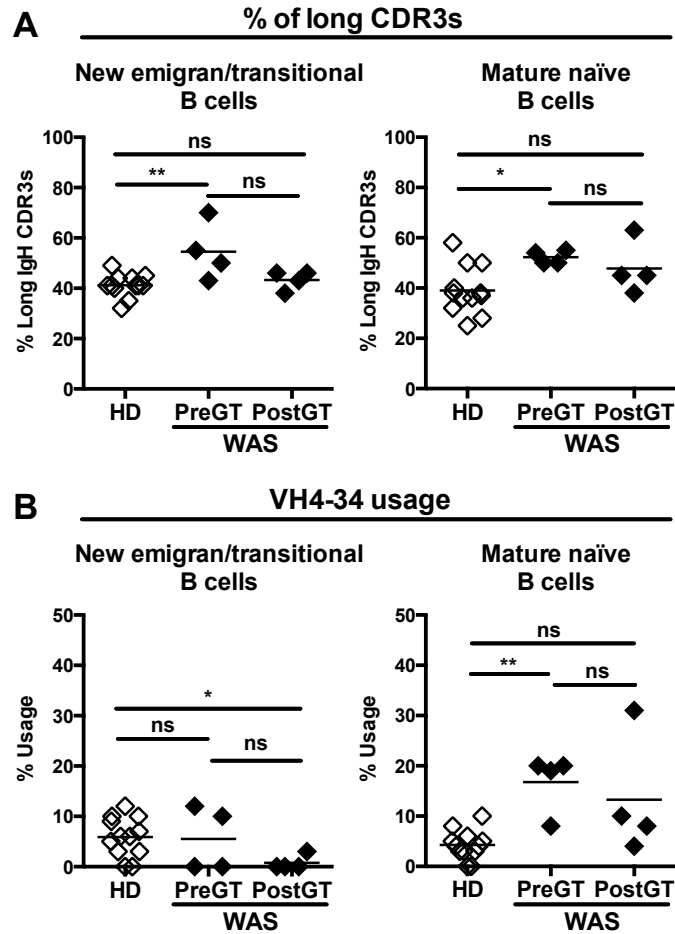

### Supplemental Figure 2

~~New emigrant/transitional and mature naive B cells B cell IgH repertoire abnormalities in WAS patients are corrected after gene therapy.~~ IgH repertoire characteristics of new emigrant/transitional and mature naive B cells from WAS patients, before and after gene therapy. (A) Frequencies of long CDR3s (>14 aa) and (B) IgH CDR3s containing two or more positively charged aa in new emigrant/transitional and mature naive B cells are represented for 11 healthy control subjects and four WAS patients before and after gene therapy. (C) VH4-34 gene-usage frequencies in new emigrant/transitional and mature naive B cells. Each diamond represents an individual; the average is shown with a bar. Mann-Whitney test was used to assess statistical significance for comparisons between patients and HDs and the paired t tests for comparisons before and after gene therapy treatment. Differences reaching statistical significance are indicated. \* $p < 0.01$ , \*\* $p < 0.001$ , ns: non significant.



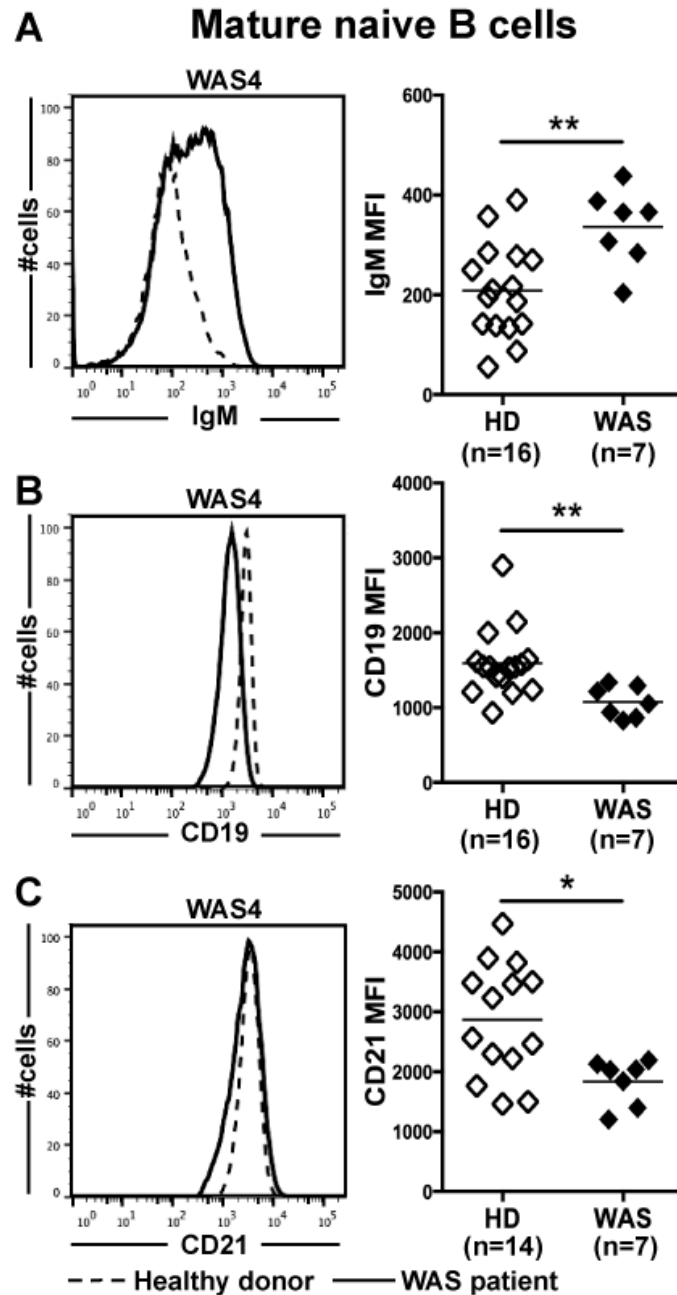

#### Supplemental Figure 4

Increased IgM cell surface expression on mature naïve B cells from WAS patients. Expression levels of (A) IgM, (B) CD19 and (C) CD21 on CD19<sup>+</sup>CD27<sup>-</sup>CD10<sup>-</sup>CD21<sup>+</sup> mature naïve B cells from HD controls and WAS patients are shown as mean fluorescence intensities (MFI). Representative flow cytometry histograms of three HD control and three WAS patient are shown on the left. Differences were analyzed for statistical significance using Mann-Whitney test. \*p < 0.01, \*\*p < 0.001.

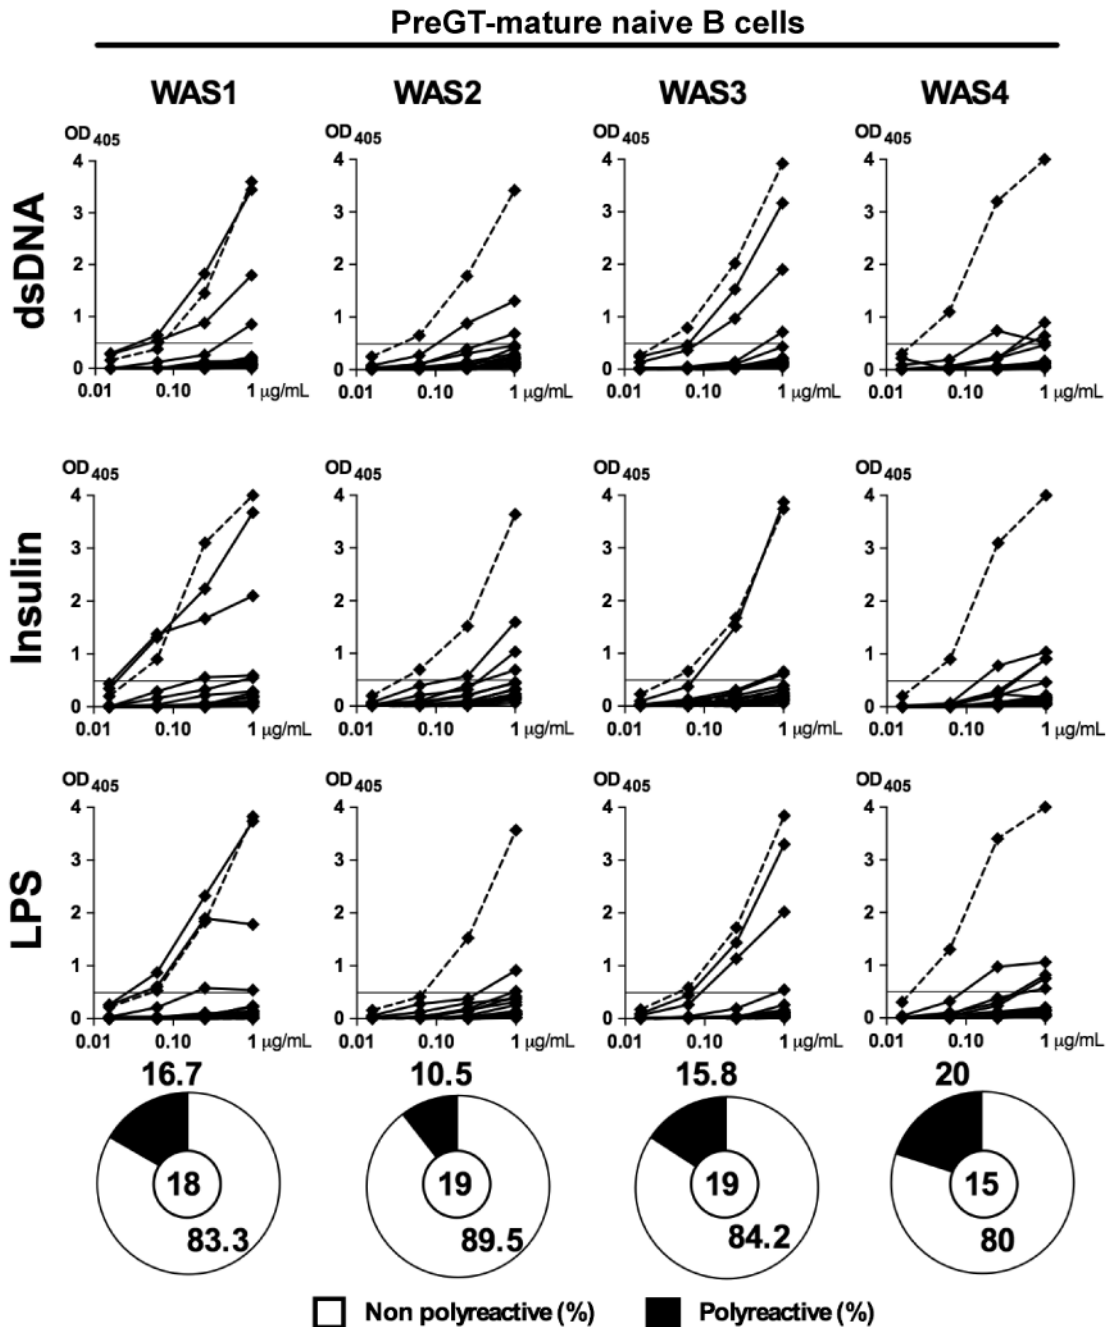

### Supplemental Figure 5

The peripheral B-cell tolerance checkpoint is defective in WAS patients. Frequency of polyreactive antibodies among mature naïve B cells from WAS patients. Antibodies from mature naïve B cells isolated from 4 WAS patients were tested by ELISA for reactivity against dsDNA, insulin and LPS. Polyreactive antibodies reacted against all 3 antigens. Dotted lines show ED38-positive control. Horizontal lines show cutoff OD405 for positive reactivity. For each individual, the frequency of reactive and non-reactive clones is summarized in pie charts, with the number of antibodies tested indicated in the center.

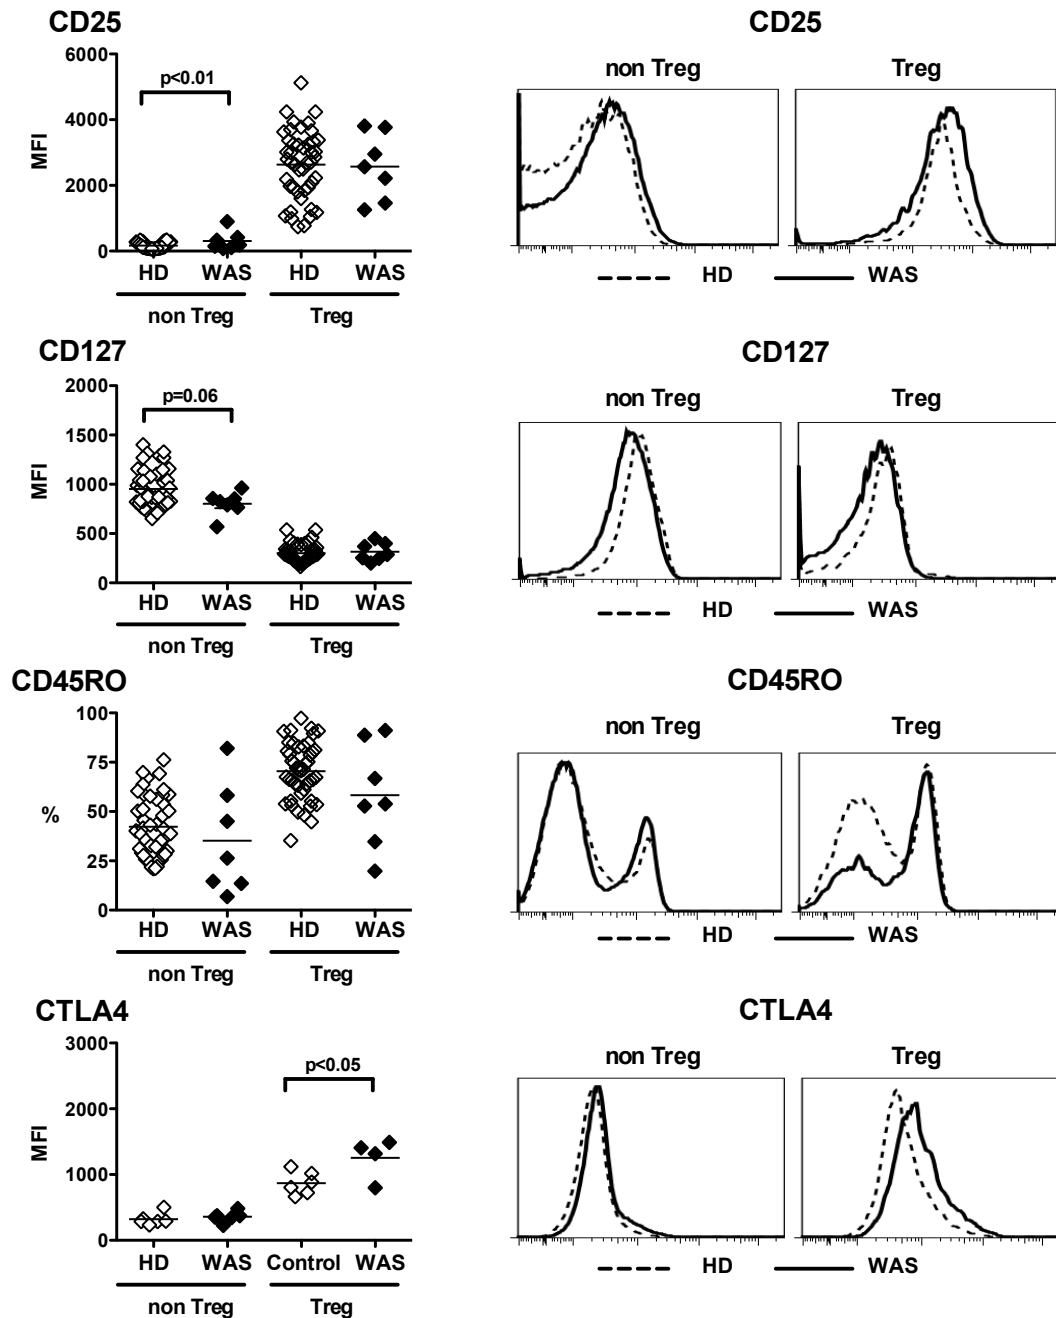

### Supplemental Figure 6

Altered Treg phenotype in WAS patients. Expression levels of CD25, CD127, CD45RO and CTLA4 on CD4<sup>+</sup>FOXP3<sup>+</sup>Helios<sup>+</sup> Treg and CD4<sup>+</sup>FOXP3<sup>+</sup>Helios<sup>-</sup> non-Treg from HD controls and WAS patients are shown as mean fluorescence intensities (MFI) (CD25, CD127 and CTLA4) and percentage (CD45RO). Representative flow cytometry histograms of one HD control and one WAS patient are shown on the right. Differences were analyzed for statistical significance using Mann-Whitney test.



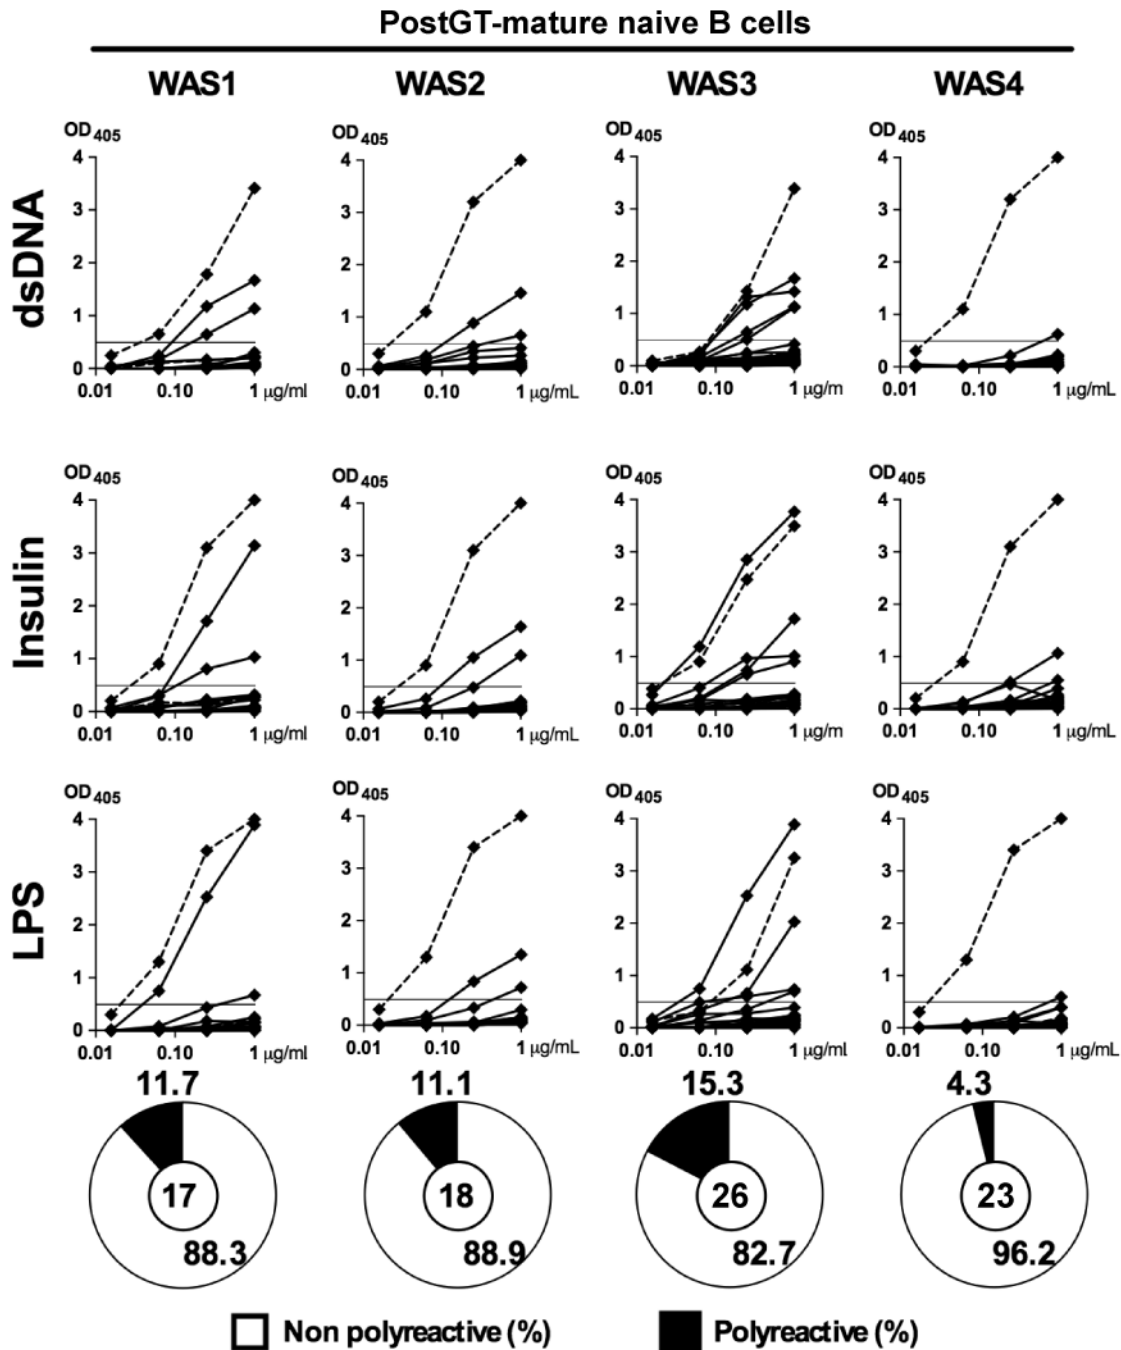

### Supplemental Figure 7

Mature naive B cells from WAS patients post-GT express normal frequencies of polyreactive antibodies. Frequency of polyreactive antibodies among mature naive B cells from WAS patients after gene therapy. Antibodies from mature naive B cells isolated from 4 WAS GT-treated patients after gene therapy were tested by ELISA for reactivity against dsDNA, insulin and LPS. Polyreactive antibodies reacted against all 3 antigens. Dotted lines show ED38-positive control. Horizontal lines show cutoff OD405 for positive reactivity. For each individual, the frequency of reactive and non-reactive clones is summarized in pie charts, with the number of antibodies tested indicated in the center.

**Table S1.** Description of WAS patients treated by LV-mediated HSC-GT.

|                                           | WAS1* <sup>¶</sup>             | WAS2* <sup>¶</sup>          | WAS3* <sup>¶</sup>          | WAS4 <sup>¶</sup>           |
|-------------------------------------------|--------------------------------|-----------------------------|-----------------------------|-----------------------------|
| <b>WAS Mutation</b>                       | Exon 10<br>c.961C>T<br>(R321X) | Exon 10<br>c.1337_1338+9del | Exon 1<br>c.37C>T<br>(R13X) | Exon 1<br>c.91G>A<br>(E31K) |
| <b>Pre HSC-GT, Zhu score</b>              | 3                              | 4                           | 3                           | 5                           |
| <b>Pre HSC-GT, yrs at analysis</b>        | 5.25                           | 1.51                        | 1.04                        | 2.23                        |
| <b>Pre HSC-GT, WASp+ lymphocytes (%)</b>  | 4.3                            | 1.5                         | 4.5                         | 3.0                         |
| <b>Pre HSC-GT, WASp+ B cells (%)</b>      | 3.9                            | 0.8                         | 17.5                        | 2.9                         |
| <b>Post HSC-GT, yrs of FU</b>             | 2                              | 1.5                         | 1                           | 1                           |
| <b>Post HSC-GT, WASp+ lymphocytes (%)</b> | 54.9                           | 69.1                        | 66.7                        | 64.9                        |
| <b>Post HSC-GT, WASp+ B cells (%)</b>     | 47                             | 50.5                        | 50.6                        | 55.8                        |

HSC-GT, Hematopoietic Stem Cell-Gene Therapy; Zhu Score, scoring system used to measure the severity of disease (1); Yrs, years; FU, follow up; c. coding DNA.

\*, Patients already described in Aiuti et al., Science 2013 (30).

<sup>¶</sup>, Patients and data already described in Castiello et al. (31).

**Table S2:** Repertoire and reactivity of antibodies from new emigrant B cells of HD30

| Ig         | HEAVY  |      |    |    |                       |        | LIGHT |    |              |        | REACTIVITY |      |          |
|------------|--------|------|----|----|-----------------------|--------|-------|----|--------------|--------|------------|------|----------|
|            | VH     | D    | RF | JH | CDR3(aa)              | Length | Vκ    | Jκ | CDR3 (aa)    | Length | Poly       | HEp2 | Staining |
| neHD30 03  | 4-39   | 5-12 | 2  | 4  | PSLSGYDYSLDY          | 12     | 3-20  | 3  | QQYGSSPLFT   | 10     | -          | -    | -        |
| neHD30 04  | 3-15   | /    | /  | 3  | GGGVGAFDI             | 9      | 2-28  | 5  | MQALQTPT     | 8      | -          | -    | C        |
| neHD30 05  | 3-30-3 | 1-26 | 2  | 6  | QSSPTGGGMDV           | 11     | 1-5   | 2  | QQYNSYSYT    | 9      | -          | +    | -        |
| neHD30 10  | 4-4    | 3-9  | 3  | 5  | VSNHILTNRLFDP         | 14     | 3-20  | 1  | QQYGSSPRT    | 9      | -          | +    | -        |
| neHD30 12  | 1-2    | 2-15 | 2  | 3  | HPIGYCSGGSCYGGAFDI    | 18     | 1-33  | 4  | QQYDNLPT     | 8      | -          | -    | -        |
| neHD30 14  | 4-34   | 3-10 | 3  | 2  | KGTMVRGVITPHWYFDL     | 18     | 2-28  | 1  | MQALQTPQT    | 9      | -          | +    | -        |
| neHD30 16  | 3-30   | /    | /  | 6  | EGVSHYYYGMDV          | 12     | 2-28  | 4  | MQALQTPPT    | 9      | -          | -    | -        |
| neHD30 20  | 3-30   | 4-17 | 2  | 6  | DIHRDYGDIETPNYYYYGMDV | 21     | 1-9   | 1  | QLNSYPLA     | 9      | -          | +    | -        |
| neHD30 24  | 3-72   | /    | /  | 6  | DNRGMDV               | 7      | 4-1   | 4  | QQYYSTPLT    | 9      | -          | -    | -        |
| neHD30 26# | 1-18   | 3-16 | 2  | 4  | NYDYIWGSYFTRGGY       | 15     | 1-33  | 3  | QQYDNLPLFT   | 10     |            |      |          |
| neHD30 43  | 3-9    | 3-22 | 2  | 2  | VDSSGLFGWYFDL         | 13     | 3-20  | 1  | QQYGSSPQT    | 9      | -          | -    | -        |
| neHD30 45# | 3-15   | 2-15 | 3  | 4  | DPLIVVVVAATRDFDY      | 16     | 1-39  | 2  | QSYSTPYT     | 9      |            |      |          |
| neHD30 02  | 4-34   | 3-10 | 2  | 4  | GQDYGGSGSTADY         | 13     |       |    |              |        |            |      |          |
| neHD30 29  | 3-23   | 6-13 | 2  | 4  | DEVSSSWLFGY           | 11     |       |    |              |        |            |      |          |
| neHD30 38  | 3-72   | 3-10 | 1  | 6  | AGSWWFGETRYGMDV       | 15     |       |    |              |        |            |      |          |
| neHD30 41  | 3-23   | 5-12 | 2  | 4  | VRGRPDSGYRFDY         | 13     |       |    |              |        |            |      |          |
| neHD30 44  | 1-69   | 2-15 | 2  | 6  | GSYCSCGGSCYSSFYGGMDV  | 21     |       |    |              |        |            |      |          |
| neHD30 46  | 3-21   | /    | /  | 6  | DDNLPIDYGGMDV         | 12     |       |    |              |        |            |      |          |
|            | VH     | D    | RF | JH | CDR3(aa)              | Length | Vλ    | Jλ | CDR3 (aa)    | Length | Poly       | HEp2 | Staining |
| neHD30 07  | 4-59   | /    | /  | 4  | DRNFDY                | 6      | 3-1   | 2  | QAWDSSTAV    | 9      | -          | -    | -        |
| neHD30 11  | 3-33   | /    | /  | 4  | GGGGGDY               | 7      | 2-14  | 2  | SSFTSITYVV   | 10     | -          | -    | -        |
| neHD30 19  | 3-11   | 1-7  | 2  | 4  | DRGNNGRPNYNWYFFDY     | 18     | 2-14  | 1  | SSYTSSSTLLYV | 12     | -          | +    | -        |
| neHD30 21# | 3-53   | 4-17 | 2  | 4  | VGRYGDYAYTISRYYFDY    | 20     | 2-14  | 2  | SSYTSSSTLGV  | 11     |            |      |          |
| neHD30 28  | 3-15   | 1-26 | 1  | 6  | AGITKFWELPGYYYYGMDV   | 19     | 1-44  | 3  | AAWDDSLNVVV  | 11     | -          | -    | -        |
| neHD30 30  | 3-23   | 2-21 | 3  | 6  | GEGGVVTTQALMDV        | 15     | 1-44  | 2  | AAWDDSLNGVV  | 11     | -          | -    | -        |
| neHD30 42  | 1-69   | 4-4  | 2  | 6  | SDYSNYVLYDYGGMDV      | 19     | 2-8   | 2  | SSYAGSNNLV   | 10     | +          | -    | -        |

RF, reading frame; #, antibody failed to be expressed; -, non-reactive; +, reactive;

C, diffuse cytoplasmic staining; N, nuclear staining; F, cytoplasmic fibers

**Table S3:** Repertoire and reactivity of antibodies from new emigrant B cells of WAS patient 1 before GT

| Ig            | HEAVY |      |    |    |                          |        | LIGHT |    |               |        | REACTIVITY |      |          |
|---------------|-------|------|----|----|--------------------------|--------|-------|----|---------------|--------|------------|------|----------|
|               | VH    | D    | RF | JH | CDR3(aa)                 | Length | Vκ    | Jκ | CDR3 (aa)     | Length | Poly       | HEp2 | Staining |
| neWAS01 04 #  | 4-39  | 2-21 | 2  | 3  | YLAYCGGDCYQPPPGSTWASAFDI | 24     | 3-20  | 5  | QQYGSSPLIT    | 10     |            |      |          |
| neWAS01 09    | 5-51  | 6-13 | 3  | 3  | RIAAAGNAFDI              | 11     | 3-15  | 4  | QQSNT         | 5      | -          | -    | -        |
| neWAS01 15    | 3-33  | 3-10 | 2  | 4  | GSHGSGSYWAPYFDY          | 15     | 3-11  | 3  | QQRSNWPLFT    | 11     | -          | -    | -        |
| neWAS01 17    | 3-66  | 2-15 | 2  | 6  | DFQYCSCGGSCYSYGMDI       | 17     | 1-12  | 1  | QQANSFPWT     | 10     | -          | -    | -        |
| neWAS01 25    | 3-7   | 2-2  | 3  | 6  | DQVVPAAFSMEGWYGMVDV      | 20     | 1-39  | 1  | QQSYSTRT      | 8      | -          | -    | -        |
| neWAS01 37    | 4-39  | 3-10 | 2  | 4  | GANYYSGSYYPFDY           | 15     | 3-20  | 1  | QQYGSSPGT     | 9      | -          | -    | -        |
| neWAS01 109   | 1-2   | /    | /  | 6  | ELVGEGAYGMDV             | 12     | 1-39  | 3  | QQSYSTPFT     | 9      | -          | -    | -        |
| neWAS01 113   | 1-69  | 1-26 | 2  | 4  | LPGRYSGSFGYLDY           | 15     | 3-15  | 4  | QQYNNWLT      | 8      | +          | +    | -        |
| neWAS01 138 # | 1-69  | /    | /  | 4  | SGTAETHFDY               | 11     | 3-15  | 1  | QQYNNWPKT     | 9      |            |      |          |
| neWAS01 139   | 3-33  | 3-10 | 3  | 6  | DYGEVRGVSVTYYGMDV        | 18     | 1-9   | 4  | QQLNSYPLT     | 9      | -          | -    | -        |
| neWAS01 141   | 1-18  | 2-21 | 2  | 5  | AVAYCGGDCYPTDTNWFDV      | 19     | 1-39  | 3  | QQSYSTPFT     | 9      | -          | -    | -        |
| neWAS01 07    |       |      |    |    |                          |        | 3-11  | 4  | QQRSNWPLT     | 9      |            |      |          |
| neWAS01 08    |       |      |    |    |                          |        | 1-5   | 1  | QQYNSYPLT     | 9      |            |      |          |
| neWAS01 22    |       |      |    |    |                          |        | 3-20  | 1  | QQYGSSPWT     | 9      |            |      |          |
| neWAS01 27    |       |      |    |    |                          |        | 3-20  | 5  | QQYGSSPITFD   | 12     |            |      |          |
| neWAS01 29    |       |      |    |    |                          |        | 2-28  | 1  | MQALQTPPWT    | 10     |            |      |          |
| neWAS01 43    |       |      |    |    |                          |        | 1-39  | 1  | QQSYSTPRT     | 9      |            |      |          |
| neWAS01 48    |       |      |    |    |                          |        | 3-20  | 2  | QQYGSSPPYT    | 10     |            |      |          |
|               | VH    | D    | RF | JH | CDR3(aa)                 | Length | Vλ    | Jλ | CDR3 (aa)     | Length | Poly       | HEp2 | Staining |
| neWAS01 01    | 1-46  | 6-13 | 3  | 6  | CMTNSIAAAGSWDYYYYYGMDV   | 22     | 3-1   | 3  | QAWDSSTV      | 8      | -          | -    | -        |
| neWAS01 02    | 3-23  | 3-16 | 2  | 4  | DSTLPSITYDYV             | 12     | 1-40  | 1  | QSYDSSLGIV    | 11     | -          | +    | -        |
| neWAS01 03    | 3-15  | 3-22 | 2  | 4  | GDRGTYYDSSGYRDY          | 16     | 9-49  | 3  | GADHGSGSNFVRV | 13     | -          | +    | -        |
| neWAS01 05    | 3-23  | 5-12 | 2  | 4  | GSGGYDTYYFDY             | 12     | 2-11  | 1  | CSYAGSSHV     | 9      | -          | -    | -        |
| neWAS01 14    | 4-61  | 2-15 | 2  | 2  | ARWYCSCGGSCQDWYFDL       | 17     | 2-14  | 2  | SSYTSSSTVV    | 10     | -          | -    | -        |
| neWAS01 32    | 4-39  | 3-22 | 2  | 5  | DGNYYDSSGSGWVDFP         | 16     | 3-21  | 2  | QVWDSSSDHVV   | 11     | -          | -    | -        |
| neWAS01 102   | 3-7   | 2-2  | 3  | 6  | DEGDIVVPARYGMDV          | 16     | 3-21  | 2  | QVWDSSSDHLVV  | 12     | -          | -    | -        |
| neWAS01 119   | 1-8   | 3-16 | 2  | 6  | SGVDYVWGSYRPPHYYYYYGMDV  | 23     | 2-11  | 2  | CSYAGSPVV     | 9      | -          | -    | -        |
| neWAS01 146   | 1-18  | 3-22 | 2  | 7  | SLYYYDSSGSDY             | 12     | 3-1   | 3  | QAWDSSTAR     | 9      | -          | -    | -        |

RF, reading frame; #, antibody failed to be expressed; -, non-reactive; +, reactive;

C, diffuse cytoplasmic staining; N, nuclear staining; F, cytoplasmic fibers

**Table S4:** Repertoire and reactivity of antibodies from new emigrant B cells of WAS patient 2 before GT

| Ig           | HEAVY |      |    |    |                        |        | LIGHT |    |              |        | REACTIVITY |      |          |
|--------------|-------|------|----|----|------------------------|--------|-------|----|--------------|--------|------------|------|----------|
|              | VH    | D    | RF | JH | CDR3(aa)               | Length | Vκ    | Jκ | CDR3 (aa)    | Length | Poly       | HEp2 | Staining |
| neWAS02 01   | 3-49  | 1-26 | 2  | 3  | DEGGSYYRGDAFDI         | 14     | 1-5   | 3  | QQYNSYSFIT   | 10     | -          | -    | -        |
| neWAS02 14   | 4-4   | 3-16 | 2  | 5  | DRGDDYVWGSYRTKPKWNWFDP | 22     | 1-5   | 1  | QQYNSYSGT    | 9      | +          | -    | -        |
| neWAS02 15   | 3-15  | 6-13 | 2  | 4  | DLPSLGSSSWYGTEWGGDYF   | 20     | 4-1   | 2  | QQYYSTPPYT   | 10     | -          | -    | -        |
| neWAS02 17   | 3-49  | 6-13 | 3  | 4  | DLIAAAVKFDY            | 11     | 2-29  | 2  | MQSIQLPLYT   | 10     | -          | +    | -        |
| neWAS02 20   | 3-15  | 2-2  | 2  | 6  | VGVCSSSTSCYRGMDV       | 16     | 2-28  | 3  | MQALQTLTLLFT | 10     | -          | -    | -        |
| neWAS02 21   | 4-34  | 6-13 | 1  | 4  | GPGQQLAWDY             | 10     | 1-39  | 3  | QQSYSTPRT    | 9      | -          | -    | -        |
| neWAS02 25 # | 3-23  | 5-5  | 1  | 4  | TIQPSLPQISYFFDY        | 15     | 3-15  | 5  | QQYNNWPFITFD | 12     |            |      |          |
| neWAS02 28   | 4-59  | 1-26 | 2  | 4  | TSGSYPYFFDY            | 11     | 3-11  | 4  | QQRSNWLT     | 8      | -          | +    | -        |
| neWAS02 30   | 4-34  | 6-19 | 2  | 4  | VNVGWGGPWSD            | 11     | 1-39  | 1  | QQSYSTPRT    | 9      | -          | +    | C        |
| neWAS02 31   | 1-24  | 4-23 | 2  | 3  | GNGGNSRQRKDAFDI        | 15     | 1-27  | 1  | QKYNAPRT     | 9      | -          | -    | -        |
| neWAS02 11   |       |      |    |    |                        |        | 1-33  | 3  | QQYDNLPT     | 9      |            |      |          |
| neWAS02 16   |       |      |    |    |                        |        | 1-39  | 1  | QQSYSTPPT    | 9      |            |      |          |
| neWAS02 22   |       |      |    |    |                        |        | 3-20  | 1  | QQYGSSTWT    | 9      |            |      |          |
| neWAS02 26   |       |      |    |    |                        |        | 1-39  | 4  | QQSYSTPLT    | 9      |            |      |          |
| neWAS02 29   |       |      |    |    |                        |        | 2-29  | 5  | MQSIQLPITFD  | 11     |            |      |          |
| neWAS02 42   |       |      |    |    |                        |        | 4-1   | 1  | QQYYSTPPWT   | 10     |            |      |          |
| neWAS02 43   |       |      |    |    |                        |        | 1-5   | 2  | QQYNSYPYT    | 9      |            |      |          |
|              | VH    | D    | RF | JH | CDR3(aa)               | Length | Vλ    | Jλ | CDR3 (aa)    | Length | Poly       | HEp2 | Staining |
| neWAS02 02   | 3-9   | 1-26 | 3  | 6  | GVGANPYYGMDV           | 12     | 2-33  | 3  | CSYAGSSTWV   | 10     | -          | -    | -        |
| neWAS02 03   | 3-23  | 3-22 | 2  | 3  | DLTEDYYDSSGSHDAFDI     | 18     | 1-44  | 2  | AAWDDSLNGPV  | 11     | -          | -    | -        |
| neWAS02 04   | 3-30  | 2-21 | 2  | 4  | DGLTLTDCGGDCYPHY       | 16     | 2-8   | 2  | SSYAGSNNLHVV | 12     | -          | -    | -        |
| neWAS02 07   | 5-51  | 5-12 | 2  | 4  | TRGKSPSKYSGYDIDY       | 16     | 7-46  | 1  | LLSYSGAYV    | 9      | -          | +    | -        |
| neWAS02 18   | 3-48  | /    | /  | 4  | GGRSSDY                | 7      | 2-14  | 2  | SSYTSSSLV    | 9      | -          | -    | -        |
| neWAS02 19   | 3-15  | 3-22 | 2  | 3  | EEYYYDSSGYSAFDI        | 16     | 1-47  | 2  | AAWDDSLSGRV  | 11     | -          | -    | -        |
| neWAS02 38   | 3-23  | 1-26 | 3  | 4  | GGGVGATTPNFDY          | 14     | 2-14  | 2  | SSYTSSSTLGV  | 11     | -          | -    | -        |
| neWAS02 39   | 1-2   | 2-15 | 3  | 3  | DREVVVVAATRGIAFDI      | 18     | 2-14  | 2  | SSYTSSSTHVV  | 11     | -          | -    | -        |
| neWAS02 40   | 3-48  | /    | /  | 4  | DLLSEIDY               | 8      | 2-14  | 2  | SSYTSSSTPV   | 10     | -          | -    | -        |
| neWAS02 45   | 3-20  | 6-13 | 3  | 3  | VFHAPAAAAGSTDAFDI      | 17     | 1-44  | 1  | AAWDDSLNGSYV | 12     | -          | -    | -        |

RF, reading frame; #, antibody failed to be expressed; -, non-reactive; +, reactive;

C, diffuse cytoplasmic staining; N, nuclear staining; F, cytoplasmic fibers

**Table S5:** Repertoire and reactivity of antibodies from new emigrant B cells of WAS patient 3 before GT

| Ig           | HEAVY  |      |    |    |                              |        | LIGHT |    |             |        | REACTIVITY |      |          |
|--------------|--------|------|----|----|------------------------------|--------|-------|----|-------------|--------|------------|------|----------|
|              | VH     | D    | RF | JH | CDR3(aa)                     | Length | Vκ    | Jκ | CDR3 (aa)   | Length | Poly       | HEp2 | Staining |
| neWAS03 06   | 3-23   | 6-19 | 3  | 2  | DLGSVAGTRRRYYWYFDL           | 17     | 3-20  | 5  | QQYGSSPIT   | 9      | -          | +    | -        |
| neWAS03 07 # | 3-9    | 3-10 | 2  | 6  | VLYGSGKNFYYYGMDV             | 17     | 3-20  | 3  | QQYGSSPIT   | 9      |            |      |          |
| neWAS03 10 # | 4-39   | 3-22 | 2  | 3  | ARYYYDSSGSADFID              | 14     | 1-5   | 5  | QQYNSYSIT   | 9      |            |      |          |
| neWAS03 11 # | 1-18   | /    | /  | 4  | ERGTTGVVDY                   | 9      | 3-11  | 2  | QQREYT      | 6      |            |      |          |
| neWAS03 14   | 3-48   | 4-17 | 3  | 3  | YTVTTRHAFDI                  | 11     | 1-39  | 3  | QQSYSTLFT   | 9      | -          | -    | -        |
| neWAS03 15   | 3-30   | 6-13 | 2  | 6  | GTLSSILLWGMDV                | 13     | 2-28  | 2  | MQALQTPYT   | 9      | -          | -    | -        |
| neWAS03 16   | 4-b    | 3-10 | 1  | 4  | IWFGELLRPLGDY                | 13     | 3-20  | 1  | QQYGSRT     | 8      | +          | -    | -        |
| neWAS03 17 # | 1-8    | 1-7  | 2  | 4  | ANY                          | 3      | 1-16  | 5  | QQYNSYPIT   | 9      |            |      |          |
| neWAS03 21   | 3-33   | 5-12 | 3  | 4  | GGVVATITQLLFDY               | 14     | 1-16  | 3  | QQYNSYPFT   | 9      | -          | +    | -        |
| neWAS03 23   | 4-39   | 6-19 | 3  | 3  | AIQNSRIAVAGTGAFDI            | 17     | 3-20  | 1  | QQYGSPPWT   | 9      | -          | -    | -        |
| neWAS03 24   | 4-39   | 3-10 | 2  | 4  | LHGSVVDY                     | 9      | 3-20  | 4  | QQYGSPLT    | 8      | -          | -    | -        |
| neWAS03 26   | 3-11   | 3-22 | 2  | 4  | DLYDSSGYLGY                  | 13     | 1-6   | 4  | LQDYNPLT    | 9      |            |      |          |
| neWAS03 27   | 3-7    | 5-12 | 3  | 3  | AGGGVATIGSDAFDI              | 15     | 1-5   | 1  | QQYNSYPWT   | 9      | -          | -    | -        |
| neWAS03 28   | 4-31   | 3-22 | 2  | 3  | ARSNYDSSGPDADFID             | 16     | 1-5   | 1  | QQYNSYPWT   | 9      | -          | +    | -        |
| neWAS03 29   | 1-3    | 3-10 | 3  | 4  | SMVRGVPPFDY                  | 10     | 1-33  | 3  | QQYDNLHIFT  | 10     | -          | -    | -        |
| neWAS03 34   | 3-30   | 5-5  | 2  | 6  | VFVSRFRPRGYSYQPPNTYYYYYGMVDV | 28     | 2-28  | 4  | MQALQTPLT   | 9      | -          | -    | -        |
| neWAS03 36 # | 3-23   | 6-13 | 3  | 2  | PTLGIAAAGPLSEDYWYFDL         | 20     | 3-11  | 5  | QQRN WPPIT  | 12     |            |      |          |
| neWAS03 37   | 3-30-3 | 4-17 | 2  | 4  | GPYDYGDPGSAY                 | 13     | 4-1   | 1  | QQYYSTLRT   | 9      | -          | -    | -        |
| neWAS03 38   | 3-15   | 2-8  | 2  | 4  | DLGYCTNGVCYRPSYFFDY          | 19     | 1-17  | 4  | LQHNSYPLT   | 9      | -          | +    | -        |
| neWAS03 41 # | 3-21   | 6-13 | 3  | 4  | ATLHEAAGNLDYFDY              | 15     | 3-11  | 2  | QQRN WPPST  | 10     |            |      |          |
| neWAS03 46 # | 3-23   | 2-15 | 3  | 4  | DMGSDIVVVAATPDY              | 16     | 1-8   | 1  | QQYNSYPRT   | 10     |            |      |          |
| neWAS03 01   |        |      |    |    |                              |        | 1-39  | 2  | QQSYSTPYT   | 9      |            |      |          |
| neWAS03 18   |        |      |    |    |                              |        | 3-15  | 1  | QQYNNWPRT   | 9      |            |      |          |
|              | VH     | D    | RF | JH | CDR3(aa)                     | Length | Vλ    | Jλ | CDR3 (aa)   | Length | Poly       | HEp2 | Staining |
| neWAS03 03   | 3-7    | 3-10 | 2  | 4  | DQYYYGSGSYLDY                | 14     | 2-11  | 1  | CSYAGSYTRYV | 11     | -          | -    | -        |
| neWAS03 13   | 3-15   | 1-26 | 2  | 4  | DPNSGSFPPGDY                 | 12     | 2-14  | 3  | SSYTSSSPWV  | 10     | -          | -    | -        |
| neWAS03 22   | 3-30   | 5-5  | 3  | 6  | DQSSGTAMAFYGMVDV             | 15     | 1-51  | 3  | GTWDSLSAGV  | 11     | -          | -    | -        |
| neWAS03 25   | 4-39   | 3-10 | 3  | 5  | DSPITMAHWFDP                 | 12     | 2-8   | 2  | SSYAGSNKPVV | 11     | -          | -    | -        |
| neWAS03 30   | 3-7    | 4-4  | 2  | 6  | SLYSNYVSLSYGMVDV             | 15     | 2-14  | 2  | SSYTSSSTLV  | 10     | -          | -    | -        |
| neWAS03 35   | 3-30   | 6-19 | 3  | 4  | DQAVAGHLFDY                  | 11     | 2-14  | 1  | SSYTSSSYV   | 9      | -          | +    | -        |
| neWAS03 39   | 3-30   | /    | /  | 3  | DTANFVTYEKIKGAFDI            | 17     | 2-11  | 1  | CSYAGSYTYV  | 10     | -          | -    | -        |
| neWAS03 43   | 5-51   | 5-5  | 2  | 3  | HFPSPPEGYSYARTLDAFDI         | 20     | 2-14  | 1  | SSYTSSSTLYV | 11     | -          | -    | -        |
| neWAS03 45   | 3-53   | 2-15 | 2  | 3  | GRPYCSGGSCVDAFDI             | 16     | 3-21  | 2  | QVWDSSTDHVV | 11     | -          | +    | -        |
| neWAS03 08   |        |      |    |    |                              |        | 1-51  | 3  | G TWDSLSAGV | 12     |            |      |          |
| neWAS03 19   |        |      |    |    |                              |        | 1-51  | 2  | CTWDSLSAVV  | 11     |            |      |          |

RF, reading frame; #, antibody failed to be expressed; -, non-reactive; +, reactive;

C, diffuse cytoplasmic staining; N, nuclear staining; F, cytoplasmic fibers

**Table S6:** Repertoire and reactivity of antibodies from new emigrant B cells of WAS patient 4 before GT

| Ig            | HEAVY  |      |    |    |                         |        | LIGHT          |                |              |        | REACTIVITY |      |          |
|---------------|--------|------|----|----|-------------------------|--------|----------------|----------------|--------------|--------|------------|------|----------|
|               | VH     | D    | RF | JH | CDR3(aa)                | Length | V <sub>κ</sub> | J <sub>κ</sub> | CDR3 (aa)    | Length | Poly       | HEp2 | Staining |
| neWAS04 14    | 3-30   | 2-15 | 2  | 4  | DLGYCSGGSCYRGDDY        | 16     | 3-15           | 2              | QQYNNWPRYT   | 10     | -          | -    | -        |
| neWAS04 15    | 3-15   | 1-26 | 2  | 6  | SGSYTKYYYYGMDV          | 14     | 1-39           | 4              | QQSYSTPLT    | 9      | -          | -    | -        |
| neWAS04 18 #  | 4-34   | 3-10 | 1  | 5  | GRREFGELLSLNWFDP        | 16     | 3-15           | 5              | QQYNNWPPITFD | 12     |            |      |          |
| neWAS04 25    | 4-30-4 | /    | /  | 4  | ETRAKHHLEGGNDY          | 14     | 1-39           | 1              | QQSYSTPRT    | 9      | -          | -    | -        |
| neWAS04 38    | 3-21   | 3-22 | 2  | 4  | VHSSGYPDY               | 9      | 3-20           | 4              | QQYGSSPPT    | 9      | -          | -    | -        |
| neWAS04 44    | 3-49   | 2-2  | 2  | 6  | GRGGGTTCPYGMDV          | 14     | 2-28           | 3              | MQALQTPQT    | 9      | -          | +    | -        |
| neWAS04 113   | 4-39   | 3-22 | 2  | 4  | GIAERYDSSGYYYYFDY       | 18     | 3-20           | 3              | QQYGSSPLFT   | 10     | -          | -    | -        |
| neWAS04 114   | 3-23   | 6-6  | 2  | 4  | PYSSSSVPSY              | 12     | 3-11           | 4              | QQRSNWPLT    | 10     | -          | -    | -        |
| neWAS04 124   | 3-9    | 4-17 | 2  | 4  | SHGDYEPFDY              | 10     | 3-15           | 1              | QQYNNWPGT    | 10     | -          | -    | -        |
| neWAS04 125   | 4-39   | 3-10 | 2  | 4  | DSGYGSGSYVNDY           | 14     | 3-20           | 3              | QQYGSSPGFT   | 10     | -          | -    | -        |
| neWAS04 126   | 3-23   | /    | /  | 4  | DRGYSISHFDY             | 11     | 3-11           | 4              | QQRSNWPT     | 8      | -          | -    | -        |
| neWAS04 130   | 4-39   | 6-19 | 3  | 4  | EGEAAVAGSFDY            | 12     | 4-1            | 2              | QQYYSTPPT    | 9      | +          | +    | -        |
| neWAS04 137 # | 1-18   | 6-19 | 2  | 6  | RPLPDLEPYSSVATDYYYYGMDV | 24     | 2-28           | 3              | MQALQTPT     | 8      |            |      |          |
| neWAS04 142 # | 3-30   | 6-13 | 3  | 4  | VPGIAAAGTLNYFDY         | 15     | 3-11           | 2              | QQRNNWLYT    | 9      |            |      |          |
| neWAS04 143   | 3-21   | 3-22 | 2  | 4  | DRYDSSGLIDY             | 11     | 1-5            | 2              | QQYNSYSGT    | 9      | -          | +    | -        |
| neWAS04 144   | 3-66   | 3-3  | 2  | 4  | DGGSREYDFWSGYDY         | 16     | 1-5            | 2              | QQYNSYSYT    | 9      | -          | +    | -        |
| neWAS04 106   | 4-b    | 6-13 | 3  | 4  | ASSIAAAGYFDY            | 12     |                |                |              |        |            |      |          |
| neWAS04 127   | 4-59   | 3-3  | 3  | 6  | DQTIFEDGVGYYYGMDV       | 18     |                |                |              |        |            |      |          |
| neWAS04 128   | 4-34   | 3-10 | 2  | 3  | EWNYGSGKRTNDAFDI        | 16     |                |                |              |        |            |      |          |
| neWAS04 132   | 3-21   | 4-17 | 3  | 2  | DAVTVTTPLWYFDL          | 15     |                |                |              |        |            |      |          |
| neWAS04 133   | 3-23   | 2-21 | 3  | 4  | SQRGVVVTASDY            | 12     |                |                |              |        |            |      |          |
| neWAS04 141   | 1-24   | 1-26 | 2  | 4  | GARD                    | 4      |                |                |              |        |            |      |          |
|               | VH     | D    | RF | JH | CDR3(aa)                | Length | V <sub>λ</sub> | J <sub>λ</sub> | CDR3 (aa)    | Length | Poly       | HEp2 | Staining |
| neWAS04 10    | 3-30   | 2-2  | 2  | 4  | EGLGYCSSTSCYFFDY        | 16     | 1-51           | 2              | GTWSSSLSGVV  | 11     | -          | -    | -        |
| neWAS04 13    | 1-18   | 3-10 | 1  | 4  | DKNRGWFGGSPVDY          | 14     | 2-18           | 2              | SLYTSSSTV    | 9      | -          | +    | -        |
| neWAS04 28    | 4-39   | 6-13 | 1  | 4  | QQQLAPDY                | 8      | 1-44           | 3              | AAWDDSLNGFWV | 12     | -          | -    | -        |
| neWAS04 31    | 3-43   | 2-15 | 3  | 6  | DGGAVVAARYYYYYGMDV      | 19     | 2-14           | 2              | SSYTSSSTV    | 10     | -          | -    | -        |
| neWAS04 102   | 3-30   | /    | /  | 6  | DSVAEWGYHYYYGMDV        | 17     | 1-51           | 3              | GTWSSLSAGV   | 11     | -          | -    | -        |
| neWAS04 104   | 3-15   | 4-23 | 2  | 4  | GDGRGYGGNPFDY           | 13     | 2-14           | 1              | SSYTSSSTV    | 9      | -          | -    | -        |
| neWAS04 109   | 3-15   | 5-12 | 3  | 4  | DLIIVATISSDY            | 12     | 1-47           | 2              | AAWDDSLSGRV  | 11     | -          | -    | -        |
| neWAS04 115   | 1-18   | 3-9  | 1  | 6  | ERYFDYYYYYYGMDV         | 16     | 1-44           | 1              | AAWDDSLNGYV  | 11     | -          | -    | C        |
| neWAS04 116   | 4-34   | 3-10 | 3  | 3  | SARRVRGDRADAFDI         | 15     | 1-51           | 2              | GTWSSSLRGVV  | 11     | -          | +    | -        |
| neWAS04 117   | 3-30   | 3-3  | 3  | 4  | DRQFGVVIITSVGNFDY       | 18     | 3-21           | 7              | QVWDSSSDQHAV | 12     | -          | -    | -        |
| neWAS04 134 # | 1-2    | 4-17 | 2  | 3  | DGDYGDYGTAFDI           | 14     | 1-47           | 3              | AAWDDSLSGRV  | 11     |            |      |          |
| neWAS04 135   | 4-34   | /    | /  | 4  | GLHLVGAEDY              | 10     | 2-11           | 1              | CSYAGSYKV    | 9      | -          | -    | -        |
| neWAS04 140   | 1-24   | /    | /  | 4  | DLGRRRTWKVDY            | 12     | 2-18           | 3              | SLYTSSSI     | 8      | -          | -    | -        |

RF, reading frame; #, antibody failed to be expressed; -, non-reactive; +, reactive;

C, diffuse cytoplasmic staining; N, nuclear staining; F, cytoplasmic fibers

**Table S7:** Repertoire and reactivity of antibodies from mature naïve B cells of HD30

| Ig          | HEAVY  |      |    |    |                      |        | LIGHT |    |             |        | REACTIVITY |      |          |
|-------------|--------|------|----|----|----------------------|--------|-------|----|-------------|--------|------------|------|----------|
|             | VH     | D    | RF | JH | CDR3(aa)             | Length | Vκ    | Jκ | CDR3 (aa)   | Length | Poly       | HEp2 | Staining |
| mnHD30 56   | 3-33   | 6-19 | 3  | 4  | DLQGIAVAGTTATGFDY    | 17     | 2-28  | 2  | MQALQTPPT   | 9      | -          | -    | -        |
| mnHD30 58   | 3-30-3 | 3-3  | 2  | 5  | DGVQEYYDFWSGYYGNWFDP | 20     | 3-20  | 1  | QQYGSSPPRT  | 10     | -          | -    | -        |
| mnHD30 66   | 1-69   | /    | /  | 3  | DDQDYLRAFDI          | 11     | 1-5   | 1  | QQYNSYST    | 8      | -          | -    | -        |
| mnHD30 67   | 1-69   | 5-24 | 3  | 4  | VGGLEMATPLDY         | 13     | 3-11  | 4  | QQRSNWPQLT  | 10     | +          | -    | -        |
| mnHD30 70 # | 5-51   | 4-4  | 2  | 5  | LLAGNDYSNPFDP        | 13     | 3-11  | 5  | QQRSNWPPLIT | 11     |            |      |          |
| mnHD30 71   | 3-13   | 2-15 | 2  | 4  | GWGYCSGGSCYGFYD      | 15     | 1-9   | 4  | QQLNSYPALT  | 10     | -          | -    | -        |
| mnHD30 72   | 3-13   | 3-10 | 2  | 6  | AWKGSCKYYYGMDV       | 14     | 2-40  | 2  | MQRIEFPYT   | 9      | -          | -    | -        |
| mnHD30 75   | 4-59   | 3-10 | 1  | 4  | GSPHTIWFGESPPPLLDY   | 18     | 1-8   | 1  | QQYYSYPQT   | 9      | +          | +    | C        |
| mnHD30 78   | 4-31   | 2-21 | 3  | 5  | SGGRHIVVTAIPPFDP     | 17     | 1-5   | 1  | QQYNSYST    | 8      | -          | -    | -        |
| mnHD30 83   | 4-31   | /    | /  | 5  | VPGKGGWFDP           | 10     | 1-27  | 4  | QKYNSAPLT   | 9      | -          | -    | -        |
| mnHD30 93   | 3-11   | 3-22 | 2  | 4  | VGIYDSSGYLYFDY       | 15     | 1-6   | 3  | LQDYNYPFT   | 9      | -          | -    | -        |
| mnHD30 95   | 1-69   | 3-10 | 2  | 4  | GGSGSYNVLY           | 11     | 1-33  | 5  | QQYDNLAF    | 8      | -          | -    | -        |
| mnHD30 49   | 3-49   | /    | /  | 4  | DWPWEPNYFDY          | 12     |       |    |             |        |            |      |          |
| mnHD30 52   | 3-30-3 | 2-21 | 2  | 2  | WELAYCGGDCHTAGAFDI   | 18     |       |    |             |        |            |      |          |
| mnHD30 57   | 1-18   | /    | /  | 4  | DVGWKFDY             | 8      |       |    |             |        |            |      |          |
| mnHD30 88   | 3-30   | 2-2  | 3  | 4  | EQVPAAMFDY           | 10     |       |    |             |        |            |      |          |
| mnHD30 92   | 3-30   | 3-10 | 1  | 4  | DSLWFGELDY           | 10     |       |    |             |        |            |      |          |
|             | VH     | D    | RF | JH | CDR3(aa)             | Length | Vλ    | Jλ | CDR3 (aa)   | Length | Poly       | HEp2 | Staining |
| mnHD30 51   | 3-21   | 3-3  | 1  | 5  | GLEWLLPPTFDP         | 12     | 2-14  | 1  | SSYTSSTLYV  | 11     | -          | -    | -        |
| mnHD30 59   | 4-31   | /    | /  | 4  | HYSYGAWDFNY          | 10     | 3-1   | 2  | QAVDSSTVV   | 9      | -          | -    | -        |
| mnHD30 60   | 3-53   | 3-9  | 2  | 3  | TTTISKTLDAFDI        | 13     | 3-21  | 3  | QVWDSSTDHPV | 11     | -          | -    | -        |
| mnHD30 68   | 3-30   | 5-12 | 2  | 4  | DLSHSGYDLGIDY        | 13     | 2-14  | 1  | SSYTSSTLV   | 10     | -          | -    | -        |
| mnHD30 76   | 7-4-1  | 1-26 | 2  | 4  | RSGSYLQDFDY          | 11     | 3-21  | 3  | QVWDSSTDHPV | 11     | -          | +    | -        |
| mnHD30 80   | 3-15   | 1-26 | 3  | 5  | DPVFIVGRASNWFDP      | 15     | 3-25  | 3  | QSADSSGSPWV | 11     | -          | +    | -        |
| mnHD30 85 # | 1-2    | /    | /  | 6  | ERIRPHLGRSGMDV       | 14     | 2-14  | 1  | SSYTSSTVHYV | 12     |            |      |          |
| mnHD30 87   | 1-69   | 3-10 | 1  | 3  | MPEGELLSAHDAFDI      | 15     | 2-11  | 3  | CSYAGSYHWV  | 10     | -          | -    | -        |
| mnHD30 91   | 3-74   | 6-19 | 2  | 3  | SSGWTGAFDI           | 10     | 3-1   | 2  | QAWDSSTVV   | 9      | -          | +    | N+C      |

RF, reading frame; #, antibody failed to be expressed; -, non-reactive; +, reactive;

C, diffuse cytoplasmic staining; N, nuclear staining; F, cytoplasmic fibers





**Table S9:** Repertoire and reactivity of antibodies from mature naïve B cells of WAS patient 2 before GT

| Ig           | HEAVY |      |    |    |                        |        | LIGHT |    |             |        | REACTIVITY |      |          |
|--------------|-------|------|----|----|------------------------|--------|-------|----|-------------|--------|------------|------|----------|
|              | VH    | D    | RF | JH | CDR3(aa)               | Length | Vκ    | Jκ | CDR3 (aa)   | Length | Poly       | HEp2 | Staining |
| mnWAS02 49   | 4-34  | 3-16 | 2  | 6  | GPHTAGRFYVWGSYHDSYGMDV | 21     | 1-5   | 4  | QQYNSYPLT   | 9      | +          | +    | C        |
| mnWAS02 52   | 4-4   | 4-23 | 1  | 2  | DRSELRWNNWYFDL         | 14     | 1-13  | 4  | QQFNSYPLT   | 9      | +          | +    | -        |
| mnWAS02 76   | 3-30  | 6-19 | 3  | 3  | DLEDWLAVAGSGAFDI       | 16     | 1-39  | 2  | QQSYSTQYT   | 9      | -          | +    | -        |
| mnWAS02 77   | 3-30  | 6-19 | 3  | 6  | DPSAVAGEGYYYYYGMDV     | 18     | 1-33  | 4  | QQYDNLPLT   | 9      | -          | -    | -        |
| mnWAS02 85   | 4-59  | 6-13 | 2  | 3  | DQDGYSSWSRAFDI         | 15     | 3-20  | 4  | QQYGSSPLT   | 9      | -          | +    | -        |
| mnWAS02 87   | 3-53  | 6-19 | 3  | 3  | ARRGAVAGFQDAFDI        | 15     | 1-5   | 3  | QQYNSPLFT   | 9      | -          | +    | -        |
| mnWAS02 90   | 3-74  | /    | /  | 4  | LLQYDY                 | 6      | 1-39  | 1  | QQSYSTPRT   | 9      | -          | +    | -        |
| mnWAS02 70   |       |      |    |    |                        |        | 3-20  | 1  | QQYGSSQWT   | 9      |            |      |          |
| mnWAS02 74   |       |      |    |    |                        |        | 2-28  | 1  | MQALQTSWT   | 9      |            |      |          |
| mnWAS02 92   |       |      |    |    |                        |        | 1-5   | 2  | QQYNSYPYT   | 9      |            |      |          |
|              | VH    | D    | RF | JH | CDR3(aa)               | Length | Vλ    | Jλ | CDR3 (aa)   | Length | Poly       | HEp2 | Staining |
| mnWAS02 51   | 3-49  | 3-16 | 1  | 4  | VVGEKLESLYYFDY         | 14     | 1-44  | 3  | AAWDDSLNGWV | 11     | -          | -    | -        |
| mnWAS02 53   | 3-13  | 4-4  | 2  | 4  | GLGGYSNYVDY            | 11     | 7-43  | 3  | LLYYGGARV   | 9      | -          | -    | -        |
| mnWAS02 55   | 4-59  | /    | /  | 4  | VGRGPMADFDY            | 11     | 2-14  | 2  | SSYTSSSTRLV | 11     | -          | -    | -        |
| mnWAS02 57   | 1-18  | 7-27 | 3  | 4  | DLTGDDYDY              | 8      | 1-40  | 1  | QSYDSSLGSGV | 12     | -          | -    | -        |
| mnWAS02 63   | 5-51  | 3-22 | 2  | 5  | TYYYDSSGYTTGRWFDP      | 17     | 1-51  | 1  | GTWDSSLAYV  | 11     | -          | -    | -        |
| mnWAS02 65   | 4-34  | 5-5  | 2  | 3  | RGYSYGHAFDI            | 11     | 2-14  | 3  | SSYTSSSTLWV | 11     | -          | -    | -        |
| mnWAS02 78   | 4-34  | 3-10 | 3  | 3  | GITMVRGVIPGYAFDI       | 16     | 1-51  | 2  | GTWDSSLAVV  | 11     | -          | -    | -        |
| mnWAS02 82   | 5-51  | /    | /  | 4  | APQRGVPEFDY            | 11     | 2-11  | 1  | CSYAGSYTYV  | 10     | -          | +    | -        |
| mnWAS02 84   | 4-34  | 4-23 | 2  | 3  | SDYAAFDI               | 8      | 2-14  | 2  | SSYTSSSTGV  | 10     | -          | -    | -        |
| mnWAS02 86   | 3-48  | 2-2  | 3  | 6  | DRVVPAARNYYYYGMDV      | 17     | 3-25  | 3  | QSADSSGTYRV | 11     | +          | +    | C        |
| mnWAS02 89   | 3-30  | 3-16 | 2  | 4  | DGLGVWGSQTSYD          | 13     | 2-14  | 3  | SSYTSSSTLV  | 10     | -          | -    | -        |
| mnWAS02 94   | 1-69  | 4-17 | 2  | 6  | ESLYGDQETRYYYGMDV      | 17     | 1-51  | 3  | GTWDSSLAWV  | 11     | -          | -    | -        |
| mnWAS02 95 # | 1-18  | 3-10 | 1  | 3  | VSVLLWFGGSRPDTSGAFDI   | 20     | 2-14  | 3  | SSYTSSSTGV  | 10     |            |      |          |

RF, reading frame; #, antibody failed to be expressed; -, non-reactive; +, reactive;

C, diffuse cytoplasmic staining; N, nuclear staining; F, cytoplasmic fibers

**Table S10:** Repertoire and reactivity of antibodies from mature naïve B cells of WAS patient 3 before GT

| Ig           | HEAVY |      |    |    |                       |        | LIGHT |    |              |        | REACTIVITY |      |          |
|--------------|-------|------|----|----|-----------------------|--------|-------|----|--------------|--------|------------|------|----------|
|              | VH    | D    | RF | JH | CDR3(aa)              | Length | Vκ    | Jκ | CDR3 (aa)    | Length | Poly       | HEp2 | Staining |
| mnWAS03 49   | 1-18  | /    | /  | 3  | ERVTVTSEGAFDI         | 13     | 4-1   | 2  | QQYYSTPYT    | 9      | -          | -    | -        |
| mnWAS03 53 # | 4-34  | 3-10 | 1  | 4  | RGFGEYPPFDY           | 10     | 3-20  | 1  | QQYGSSPWT    | 9      |            |      |          |
| mnWAS03 54   | 3-15  | 6-13 | 3  | 6  | DRLSIAAAGTPNGPYYYGMDV | 22     | 1-33  | 2  | QQYDNLPLYT   | 9      | -          | -    | -        |
| mnWAS03 56   | 3-33  | /    | /  | 4  | DLEGLSRFGETGYSSSWALGY | 21     | 1-39  | 4  | QQSYSTPPLT   | 10     | -          | +    | C        |
| mnWAS03 65   | 3-20  | /    | /  | 6  | DRAPYYYYGMDV          | 12     | 1-39  | 3  | QQSYSTPQEFT  | 11     | +          | +    | -        |
| mnWAS03 67   | 1-3   | 6-13 | 2  | 5  | DANSSSWPDHNPSPNNWFDP  | 21     | 1-5   | 1  | QQYNSYPT     | 8      | -          | -    | -        |
| mnWAS03 69   | 3-23  | 3-10 | 3  | 4  | DRQTFMVRGVIDGY        | 14     | 4-1   | 1  | QQYYSTPRT    | 9      | +          | +    | -        |
| mnWAS03 70   | 4-59  | 2-21 | 3  | 3  | EFDGPSVVVTGHDAFDI     | 17     | 3-20  | 4  | QQYGSSPPLT   | 10     | -          | +    | -        |
| mnWAS03 77 # | 4-34  | 6-13 | 1  | 2  | GFQQQLAQGYFDL         | 13     | 2-29  | 1  | MQSIQRPWT    | 9      |            |      |          |
| mnWAS03 85   | 3-48  | 5-5  | 2  | 6  | DMSGYSYGYYYGMDV       | 17     | 3-20  | 2  | QQYGSSSYT    | 9      | +          | +    | N        |
| mnWAS03 86   | 5-51  | /    | /  | 4  | NAFTPAPGVG            | 10     | 1-17  | 2  | LQHNSYPYT    | 9      | -          | +    | -        |
| mnWAS03 88   | 3-9   | /    | /  | 4  | SHQSGVIF              | 8      | 3-11  | 4  | QQRSNWLT     | 8      | -          | -    | -        |
| mnWAS03 93 # | 4-31  | 3-22 | 2  | 4  | GRVYYYYDSSGSAFDY      | 16     | 1-5   | 1  | QQYNSYPWT    | 9      |            |      |          |
| mnWAS03 28   |       |      |    |    |                       |        | 1-8   | 4  | QQYYS YPLT   | 10     |            |      |          |
| mnWAS03 29   |       |      |    |    |                       |        | 1-27  | 4  | QKYNSAPLT    | 9      |            |      |          |
|              | VH    | D    | RF | JH | CDR3(aa)              | Length | Vλ    | Jλ | CDR3 (aa)    | Length | Poly       | HEp2 | Staining |
| mnWAS03 51   | 3-9   | 6-19 | 3  | 6  | DIRAVAGTNYYYGMDV      | 17     | 1-51  | 3  | GTWDSLSAGV   | 11     | -          | -    | -        |
| mnWAS03 57   | 5-51  | 3-10 | 2  | 3  | GRGDYGSYSFPAGAFDI     | 18     | 1-44  | 2  | AAWDDSLNGLVV | 12     | -          | -    | -        |
| mnWAS03 62   | 3-23  | 3-10 | 2  | 4  | DSERTHSLDYGSGSYDPFDY  | 22     | 3-21  | 2  | QWWDSSSDHRRV | 12     | -          | +    | -        |
| mnWAS03 63   | 4-39  | 3-10 | 2  | 4  | EHGSGYSLDY            | 11     | 2-14  | 3  | SSYTSSSTLWV  | 11     | -          | -    | -        |
| mnWAS03 68 # | 1-69  | 3-10 | 2  | 4  | EVEYYYGSGSYTRGRFDY    | 19     | 3-1   | 2  | QAWDSSTVV    | 9      |            |      |          |
| mnWAS03 74   | 3-33  | 3-10 | 3  | 4  | DGDGITMVRGVTPRYFDY    | 18     | 2-14  | 1  | SSYTSSNSYV   | 10     | -          | +    | -        |
| mnWAS03 75   | 3-23  | 3-22 | 2  | 3  | DLYDSSGYWGDDAFDI      | 16     | 2-14  | 3  | SSYTSSSTRV   | 10     | -          | -    | -        |
| mnWAS03 78 # | 3-9   | 1-26 | 2  | 4  | DMLSGSRPAYFDY         | 13     | 2-14  | 1  | SSYTSSSTPLYV | 12     |            |      |          |
| mnWAS03 80   | 3-30  | 1-26 | 3  | 4  | LVGATQGDY             | 9      | 2-14  | 1  | SSYTSSSTL    | 9      | -          | -    | -        |
| mnWAS03 82   | 3-20  | 2-15 | 2  | 4  | DLARYCSGGSCYPLGPEFDY  | 20     | 1-51  | 2  | GTWDSLSAVV   | 11     | -          | -    | -        |
| mnWAS03 91   | 3-9   | 1-26 | 3  | 6  | DFNRGRGSGGMDV         | 13     | 3-1   | 2  | QAWDSSTAV    | 9      | -          | -    | F        |

RF, reading frame; #, antibody failed to be expressed; -, non-reactive; +, reactive;

C, diffuse cytoplasmic staining; N, nuclear staining; F, cytoplasmic fibers

**Table S11:** Repertoire and reactivity of antibodies from mature naïve B cells of WAS patient 4 before GT

| Ig            | HEAVY |      |    |    |                    |        | LIGHT |    |             |        | REACTIVITY |      |          |
|---------------|-------|------|----|----|--------------------|--------|-------|----|-------------|--------|------------|------|----------|
|               | VH    | D    | RF | JH | CDR3(aa)           | Length | Vκ    | Jκ | CDR3 (aa)   | Length | Poly       | HEp2 | Staining |
| mnWAS04 53    | 4-34  | 6-6  | 2  | 4  | GFSSSPNDY          | 9      | 3-20  | 4  | QQYGSSPLT   | 9      | -          | +    | -        |
| mnWAS04 64    | 3-49  | 3-3  | 1  | 2  | DEVVLRFLFWLPTGSDL  | 17     | 1-33  | 2  | QQYDNLPLT   | 9      | +          | +    | -        |
| mnWAS04 73    | 4-39  | 6-19 | 3  | 6  | GGIAVAGMIINYYGMDV  | 17     | 1-5   | 1  | QQYNSYPWT   | 9      | -          | +    | C        |
| mnWAS04 74    | 3-7   | 5-5  | 3  | 6  | AWGAAMVTRDYGMDV    | 15     | 1-16  | 1  | LQYKTYPRT   | 9      | -          | +    | -        |
| mnWAS04 90    | 3-23  | 6-6  | 3  | 5  | PPVRIAARVR         | 10     | 1-33  | 2  | QQYDNLPPYT  | 10     | +          | +    | -        |
| mnWAS04 94    | 3-11  | 6-19 | 3  | 4  | DQVAPLLRAKSGAIDY   | 16     | 1-39  | 1  | QQSYSTPPWT  | 10     | -          | +    | -        |
| mnWAS04 162 # | 4-34  | 2-15 | 3  | 4  | AAAVSVVDETPYYFDY   | 17     | 3-20  | 5  | QQYGSSPITFD | 11     |            |      |          |
| mnWAS04 164   | 1-2   | 4-17 | 2  | 3  | DGDYGDYGTAFDI      | 14     | 3-20  | 4  | QQYGSSL     | 7      | -          | -    | -        |
| mnWAS04 165   | 3-30  | 4-17 | 2  | 3  | DPFDYGDYPDAFDI     | 14     | 1-5   | 2  | QQYNSYPYT   | 9      | -          | -    | -        |
| mnWAS04 177   | 3-23  | 2-21 | 3  | 4  | DSSGDIVVTTDDY      | 13     | 3-11  | 2  | QQRSNWPPVT  | 10     | -          | -    | -        |
| mnWAS04 87    | 3-15  | 3-10 | 1  | 5  | DLSSVVGKWWFGDV     | 14     |       |    |             |        |            |      |          |
| mnWAS04 91    | 3-30  | /    | /  | 4  | GGHATLWGGFDY       | 12     |       |    |             |        |            |      |          |
|               | VH    | D    | RF | JH | CDR3(aa)           | Length | Vλ    | Jλ | CDR3 (aa)   | Length | Poly       | HEp2 | Staining |
| mnWAS04 49    | 3-30  | 6-19 | 3  | 4  | EGEAAVAGSFDY       | 12     | 2-23  | 2  | CSYAGSSTLVV | 11     | -          | -    | -        |
| mnWAS04 51    | 4-34  | 3-3  | 2  | 3  | PSGNYDFWSGYPIFAFDI | 18     | 3-21  | 3  | QVWDSSTLHWV | 11     | +          | +    | C        |
| mnWAS04 57    | 3-48  | 3-10 | 1  | 3  | QDRVPWFGEYGVFDI    | 16     | 1-44  | 1  | AAWDDSLNGLF | 11     | -          | -    | -        |
| mnWAS04 80    | 4-59  | 3-3  | 1  | 4  | SLKKWLLSY          | 9      | 1-51  | 2  | GTWDSLSLGVV | 11     | -          | -    | -        |
| mnWAS04 186   | 3-66  | 2-2  | 3  | 4  | GSDIVVPAALTFDY     | 15     | 3-1   | 3  | QAWDSSTLVL  | 10     | -          | -    | -        |
| mnWAS04 188   | 1-69  | /    | /  | 6  | GNYYYYGMDV         | 10     | 2-14  | 2  | SSYTSSTLVV  | 11     | -          | -    | -        |

RF, reading frame; #, antibody failed to be expressed; -, non-reactive; +, reactive;

C, diffuse cytoplasmic staining; N, nuclear staining; F, cytoplasmic fibers

**Table S12:** Repertoire and reactivity of antibodies from new emigrant B cells of WAS patient 1 after GT

| Ig            | HEAVY  |      |    |    |                     |        | LIGHT          |                |              |        | REACTIVITY |      |          |
|---------------|--------|------|----|----|---------------------|--------|----------------|----------------|--------------|--------|------------|------|----------|
|               | VH     | D    | RF | JH | CDR3(aa)            | Length | V <sub>κ</sub> | J <sub>κ</sub> | CDR3 (aa)    | Length | Poly       | HEp2 | Staining |
| neWAS01p 01   | 3-23   | 3-22 | 2  | 1  | SDSSGYYSIYFQH       | 13     | 1-12           | 4              | QQANSFPLT    | 9      | -          | -    | -        |
| neWAS01p 06 # | 1-69   | 3-22 | 3  | 3  | GAGDITMIVQEEGAFDI   | 17     | 3-20           | 4              | QQYGSSPLT    | 9      |            |      |          |
| neWAS01p 08   | 3-53   | 4-23 | 2  | 4  | DYGGKRGDY           | 9      | 3-11           | 2              | QQRSNWPPHT   | 10     | -          | -    | -        |
| neWAS01p 11 # | 3-23   | 2-2  | 2  | 4  | DRGCSSTCTYYFDY      | 15     | 1-33           | 2              | QQYDNLPLT    | 9      |            |      |          |
| neWAS01p 12   | 1-46   | 5-5  | 2  | 4  | DRVEYSYGPFDY        | 12     | 3-20           | 2              | QQYGSSPPLMYT | 12     | -          | -    | -        |
| neWAS01p 13   | 4-30-2 | 4-17 | 2  | 4  | VGRSSDYGDYRGPSHYFDY | 19     | 1-39           | 4              | QSYSTLLT     | 9      | -          | +    | -        |
| neWAS01p 14 # | 4-61   | /    | /  | 5  | HRPVAGINWFDP        | 12     | 1-39           | 2              | QSYSTPYT     | 9      |            |      |          |
| neWAS01p 15   | 3-30   | 6-19 | 2  | 6  | VGSSGWYAPPYYGMDV    | 16     | 1-39           | 4              | QSYSTPLT     | 9      | -          | +    | -        |
| neWAS01p 19   | 3-15   | 1-26 | 2  | 6  | ETHNSGSLYYYYYGMV    | 19     | 1-39           | 4              | QSYSTPLT     | 9      | -          | +    | -        |
| neWAS01p 25 # | 1-46   | 5-5  | 2  | 4  | DRVEYSYGPFDY        | 12     | 1-27           | 4              | QKYNAPLT     | 9      |            |      |          |
| neWAS01p 36   | 7-4-1  | /    | /  | 3  | DTWPNAFDI           | 9      | 4-1            | 1              | QQYYSTPRT    | 9      | -          | -    | -        |
| neWAS01p 38   | 3-15   | 6-25 | 3  | 4  | DRIGIAASRGPGRSNNFDY | 20     | 3-11           | 4              | QQRSNWPPLT   | 10     | +          | +    | -        |
| neWAS01p 40   | 3-15   | 2-2  | 3  | 6  | DEVIVVPAATNYYYYGMV  | 20     | 3-20           | 3              | QQYGSSPH     | 8      | -          | -    | -        |
| neWAS01p 28   | 4-39   | 3-16 | 1  | 4  | GGGELSLPIDY         | 12     |                |                |              |        |            |      |          |
| neWAS01p 32   | 1-69   | 3-22 | 2  | 4  | DRDYDSSGYVDGFDY     | 16     |                |                |              |        |            |      |          |
| neWAS01p 35   | 1-24   | 4-23 | 2  | 3  | PKPRYGGNSVSSPAFDI   | 17     |                |                |              |        |            |      |          |
| neWAS01p 33   |        |      |    |    |                     |        | 3-15           | 1              | QQYNNWPMA    | 9      |            |      |          |
| neWAS01p 39   |        |      |    |    |                     |        | 3-20           | 4              | QQYGSSPPLT   | 11     |            |      |          |
|               | VH     | D    | RF | JH | CDR3(aa)            | Length | V <sub>λ</sub> | J <sub>λ</sub> | CDR3 (aa)    | Length | Poly       | HEp2 | Staining |
| neWAS01p 02 # | 3-30   | 3-22 | 2  | 4  | AFHGDSSGYSCDY       | 14     | 1-51           | 3              | GTWDSLSAGV   | 11     |            |      |          |
| neWAS01p 17 # | 7-4-1  | 6-19 | 3  | 4  | DHHAVAGTALTPGLGH    | 16     | 1-44           | 3              | AAWDDSLNGWV  | 11     |            |      |          |
| neWAS01p 20   | 3-33   | /    | /  | 6  | GGAGYHYYYGMV        | 13     | 3-21           | 3              | QVWDSSSDHWV  | 11     | -          | -    | -        |
| neWAS01p 24   | 3-30   | /    | /  | 4  | SFDY                | 4      | 2-14           | 3              | SSYTSSTDWV   | 11     | +          | -    | -        |
| neWAS01p 26 # | 3-48   | 3-16 | 3  | 2  | EYMITFGGVRDANWYFDL  | 18     | 2-23           | 2              | CSYAGSSTFE   | 10     | -          | -    | -        |
| neWAS01p 30   | 4-30-4 | 5-5  | 2  | 3  | GGYSYDAQGAFDI       | 13     | 2-14           | 2              | SSYTSSTV     | 10     | -          | -    | -        |
| neWAS01p 31 # | 3-30-3 | 3-10 | 3  | 4  | VGSVTMVRGVDY        | 12     | 6-57           | 3              | QSYDSSTWV    | 9      |            |      |          |
| neWAS01p 43   | 7-4-1  | 2-2  | 3  | 6  | DRLFVVVPAAYGMV      | 15     | 2-23           | 2              | CSYAGSSTLV   | 10     | -          | +    | -        |
| neWAS01p 45   | 1-18   | 4-17 | 3  | 3  | RATVTTTGAFDI        | 12     | 2-23           | 3              | CSYAGSSTWV   | 10     | -          | -    | -        |
| neWAS01p 46   | 3-30   | /    | /  | 6  | LGYYGMV             | 8      | 2-23           | 1              | CSSAGSTSYV   | 10     | -          | +    | -        |
| neWAS01p 47   | 1-18   | 6-13 | 2  | 4  | LGHSSSWTFDY         | 11     | 2-14           | 3              | SSYTSSTWV    | 10     | -          | -    | -        |
| neWAS01p 27   |        |      |    |    |                     |        | 1-47           | 3              | AAWDDSLSVNWV | 12     |            |      |          |
| neWAS01p 37   |        |      |    |    |                     |        | 2-14           | 3              | SSYTSSSIWV   | 10     |            |      |          |

RF, reading frame; #, antibody failed to be expressed; -, non-reactive; +, reactive;

C, diffuse cytoplasmic staining; N, nuclear staining; F, cytoplasmic fibers

**Table S13:** Repertoire and reactivity of antibodies from new emigrant B cells of WAS patient 2 after GT

| Ig            | HEAVY |      |    |    |                        |        | LIGHT |    |              |        | REACTIVITY |      |          |
|---------------|-------|------|----|----|------------------------|--------|-------|----|--------------|--------|------------|------|----------|
|               | VH    | D    | RF | JH | CDR3(aa)               | Length | Vκ    | Jκ | CDR3 (aa)    | Length | Poly       | HEp2 | Staining |
| neWAS02p 02 # | 1-2   | 4-4  | 2  | 4  | VDRDSNSSLGFDY          | 13     | 1-39  | 1  | QSYSTPRT     | 9      |            |      |          |
| neWAS02p 04   | 3-30  | 3-22 | 2  | 4  | GGYDSSGSWDY            | 11     | 3-15  | 1  | QYNNWPPWT    | 10     | -          | -    | -        |
| neWAS02p 05   | 3-11  | 3-10 | 2  | 6  | NGSGSYSLYYYGMDV        | 17     | 1-9   | 1  | QLNSYPWT     | 9      | -          | -    | -        |
| neWAS02p 09   | 4-59  | 6-19 | 2  | 3  | GGSSGADAFDI            | 11     | 3-20  | 4  | QFGKSLT      | 8      | -          | -    | -        |
| neWAS02p 12   | 3-15  | /    | /  | 4  | GVEAYPLPDY             | 10     | 1-8   | 2  | QYYSYPRT     | 10     | -          | -    | -        |
| neWAS02p 14   | 3-11  | 1-7  | 2  | 4  | PSGPDNWNVY             | 9      | 3-15  | 3  | QYNNWPLFT    | 11     | -          | +    | -        |
| neWAS02p 20   | 4-59  | 4-4  | 3  | 6  | EVTTCGMDV              | 9      | 1-39  | 2  | QSYSTPYT     | 9      | -          | -    | -        |
| neWAS02p 28 # | 1-58  | 6-6  | 3  | 4  | DGVIAARGLPDY           | 13     | 3-15  | 2  | QYNNWPTY     | 9      |            |      |          |
| neWAS02p 30   | 3-21  | 1-7  | 2  | 4  | DFGSIWNVPSDY           | 13     | 1-17  | 2  | LQHNSYPYT    | 9      | +          | +    | C        |
| neWAS02p 32 # | 3-49  | 6-13 | 3  | 4  | GGPRAIAAGTKGEGVFDY     | 19     | 1-16  | 5  | QYNSYPIT     | 9      |            |      |          |
| neWAS02p 33   | 3-53  | /    | /  | 2  | DPREGIYWYFDL           | 12     | 3-20  | 2  | QYGSPPYT     | 10     | -          | -    | -        |
| neWAS02p 34   | 3-74  | 5-5  | 3  | 4  | VGVDTAMVTPVDY          | 13     | 3-15  | 2  | QYNNWPLMYT   | 11     | -          | +    | -        |
| neWAS02p 37   | 3-7   | 3-10 | 2  | 2  | EYSGSYPHWYFDL          | 15     | 3-20  | 1  | QYGT         | 5      | -          | +    | -        |
| neWAS02p 39   | 3-33  | 4-23 | 2  | 3  | EVSPRYGGNSGVSAFDI      | 17     | 3-20  | 2  | QYGSPPMYT    | 10     | -          | -    | -        |
| neWAS02p 18   | 3-74  | 2-2  | 3  | 6  | DETAEDIVVPAIYYGMDV     | 20     |       |    |              |        |            |      |          |
| neWAS02p 43   | 1-18  | 5-12 | 2  | 5  | DNGGWDSGYDFGGWFDP      | 17     |       |    |              |        |            |      |          |
| neWAS02p 46   | 3-30  | 2-2  | 3  | 6  | DIVVPAALYYYGMDV        | 17     |       |    |              |        |            |      |          |
| neWAS02p 47   | 4-59  | 2-2  | 2  | 3  | GYCSSTSCRASNGAFDI      | 18     |       |    |              |        |            |      |          |
| neWAS02p 17   |       |      |    |    |                        |        | 3-15  | 2  | QYNNWPPDT    | 10     |            |      |          |
| neWAS02p 24   |       |      |    |    |                        |        | 3-20  | 2  | QYGSPPYT     | 9      |            |      |          |
| neWAS02p 26   |       |      |    |    |                        |        | 3-20  | 1  | QYGSLLPT     | 9      |            |      |          |
| neWAS02p 27   |       |      |    |    |                        |        | 3-20  | 3  | QYGSPPFT     | 10     |            |      |          |
|               | VH    | D    | RF | JH | CDR3(aa)               | Length | Vλ    | Jλ | CDR3 (aa)    | Length | Poly       | HEp2 | Staining |
| neWAS02p 03   | 1-69  | /    | /  | 6  | DHRQPQAYYYYGMDV        | 16     | 2-14  | 1  | SSYTSSTRV    | 10     | -          | -    | -        |
| neWAS02p 06 # | 1-46  | 5-5  | 2  | 4  | GTFLPGYSYAPGYFDY       | 17     | 2-14  | 1  | SSYTSSTYV    | 10     |            |      |          |
| neWAS02p 13   | 3-30  | 2-2  | 3  | 4  | DIGVVAASCIDY           | 14     | 1-47  | 2  | AAWDDSLGGRVV | 13     | -          | -    | -        |
| neWAS02p 21   | 4-61  | 3-10 | 2  | 4  | YGSGSYTRDTAVAGYLDY     | 18     | 1-44  | 1  | AAWDDSLNGYV  | 11     | -          | -    | -        |
| neWAS02p 22   | 3-15  | 3-22 | 3  | 4  | SRITMIVGY              | 9      | 1-44  | 2  | AAWDDSLNGVV  | 11     | -          | +    | -        |
| neWAS02p 23   | 3-11  | 2-15 | 2  | 6  | VGYCSCGGSCYPTGSYYYGMDV | 21     | 2-14  | 2  | SSYTSSTLV    | 10     | -          | -    | -        |
| neWAS02p 25   | 3-53  | 4-23 | 3  | 5  | SDPTTVVPQFDP           | 12     | 2-23  | 3  | CSYAGSSTFG   | 10     | -          | +    | -        |
| neWAS02p 35   | 3-7   | 3-22 | 2  | 3  | EMHYDSELGVNAFDI        | 17     | 2-14  | 1  | SSYTSSTLYV   | 11     | -          | -    | -        |
| neWAS02p 38   | 3-13  | 6-19 | 2  | 4  | ANYSSGWYGVYD           | 12     | 2-23  | 2  | CSYAGSSTLV   | 10     | -          | -    | -        |
| neWAS02p 44   | 4-4   | 5-5  | 2  | 4  | SDGYSYGFYD             | 10     | 2-23  | 1  | CSYAGSSTYV   | 10     | -          | -    | -        |

RF, reading frame; #, antibody failed to be expressed; -, non-reactive; +, reactive;

C, diffuse cytoplasmic staining; N, nuclear staining; F, cytoplasmic fibers

**Table S14:** Repertoire and reactivity of antibodies from new emigrant B cells of WAS patient 3 after GT

| Ig            | HEAVY  |      |    |    |                        |        | LIGHT          |                |               |        | REACTIVITY |      |          |
|---------------|--------|------|----|----|------------------------|--------|----------------|----------------|---------------|--------|------------|------|----------|
|               | VH     | D    | RF | JH | CDR3(aa)               | Length | V <sub>κ</sub> | J <sub>κ</sub> | CDR3 (aa)     | Length | Poly       | HEp2 | Staining |
| neWAS03p 03   | 4-39   | 3-22 | 2  | 4  | DLLNYDSSGY             | 10     | 3-20           | 1              | QQYGSSPPWT    | 10     | -          | -    | -        |
| neWAS03p 06   | 3-30-3 | 4-23 | 2  | 4  | RQRVWVDYGAAVDY         | 14     | 3-20           | 5              | QQYGSSPIT     | 9      | -          | +    | -        |
| neWAS03p 08   | 3-73   | 1-26 | 1  | 4  | PGRDLELLIDY            | 11     | 1-39           | 1              | QQSYSTPWT     | 9      | -          | -    | -        |
| neWAS03p 10   | 3-30   | 6-19 | 3  | 4  | PTVGVGLAVAAPFDY        | 15     | 1-5            | 2              | QQYNSYST      | 8      | -          | +    | -        |
| neWAS03p 14   | 3-30   | /    | /  | 3  | ARRPGTSGAADAFFDI       | 15     | 1-39           | 1              | QQSYSTPQT     | 9      | -          | +    | -        |
| neWAS03p 18   | 3-30   | 6-6  | 3  | 6  | GGIAARSYYYGMDV         | 14     | 1-12           | 3              | QQANSFPFT     | 9      | -          | +    | -        |
| neWAS03p 25   | 3-49   | 6-19 | 3  | 1  | GAVAGLEYFQH            | 11     | 3-15           | 3              | QQYNNWPYS     | 9      | -          | -    | -        |
| neWAS03p 30   | 1-18   | 6-13 | 3  | 4  | KPIAAAGTGWVVDY         | 14     | 3-15           | 1              | QQYSNWPQT     | 9      | -          | +    | -        |
| neWAS03p 35   | 4-39   | 6-19 | 2  | 4  | FHPYSGWLADY            | 11     | 1-5            | 1              | QQYNSYST      | 8      | -          | +    | -        |
| neWAS03p 38 # | 3-30-3 | 2-2  | 3  | 2  | AAIVVPAAMPAYWFDL       | 17     | 3-15           | 4              | QQYNNWPPLT    | 10     |            |      |          |
| neWAS03p 42   | 3-15   | 5-24 | 3  | 4  | GAQMATINQAYYFDY        | 15     | 3-15           | 2              | QQYNNWPPYT    | 10     | +          | -    | -        |
| neWAS03p 45   | 1-58   | 2-2  | 3  | 4  | VAHIVVPAAPGY           | 13     | 3-20           | 1              | QQYGSSPWT     | 9      | +          | +    | C        |
| neWAS03p 07   | 4-31   | 3-22 | 2  | 4  | SSGYDSSGSYSDY          | 13     |                |                |               |        |            |      |          |
| neWAS03p 17   | 3-48   | 4-17 | 2  | 4  | NYGGDY                 | 6      |                |                |               |        |            |      |          |
| neWAS03p 20   | 3-15   | /    | /  | 2  | INTPPTIAHWYFHL         | 14     |                |                |               |        |            |      |          |
| neWAS03p 21   | 3-49   | 3-22 | 2  | 4  | VGDLTYYYDSSGYIDFDY     | 18     |                |                |               |        |            |      |          |
| neWAS03p 28   | 4-b    | 2-15 | 3  | 3  | HTVVAATPHAFDI          | 14     |                |                |               |        |            |      |          |
| neWAS03p 15   |        |      |    |    |                        |        | 1-39           | 1              | QQSYSTPRT     | 9      |            |      |          |
| neWAS03p 34   |        |      |    |    |                        |        | 1-5            | 5              | QQYNSYSIT     | 9      |            |      |          |
|               | VH     | D    | RF | JH | CDR3(aa)               | Length | V <sub>λ</sub> | J <sub>λ</sub> | CDR3 (aa)     | Length | Poly       | HEp2 | Staining |
| neWAS03p 01   | 3-21   | 3-22 | 2  | 3  | AHIESSYDSSVNAFDI       | 16     | 1-40           | 2              | QSYDSSLGQV    | 11     | -          | -    | -        |
| neWAS03p 02   | 3-23   | 2-15 | 2  | 4  | DSVPFGGGSCYGH          | 13     | 1-40           | 2              | QSYDSSLGQV    | 11     | -          | -    | -        |
| neWAS03p 04   | 5-51   | 2-15 | 2  | 4  | LLGYCSGGSCYGFDFY       | 16     | 1-44           | 3              | AAWDDSLNGPV   | 11     | -          | -    | -        |
| neWAS03p 05   | 3-33   | 3-10 | 2  | 4  | DLIHPFYGSGSYNGLGY      | 18     | 2-5            | 3              | CSYTSSATWV    | 10     | -          | +    | -        |
| neWAS03p 06   | 3-30-3 | 4-23 | 2  | 4  | RQRVWVDYGAAVDY         | 14     | 1-44           | 2              | AAWDDSLNGHV   | 12     | -          | +    | M        |
| neWAS03p 11   | 1-3    | 6-19 | 3  | 5  | VAVAGTDYLQYNWFDP       | 16     | 1-40           | 3              | QSYDSSLGQV    | 11     | -          | -    | -        |
| neWAS03p 13   | 7-4-1  | 2-15 | 2  | 4  | NLGYCSGGSCRLAY         | 15     | 1-44           | 3              | AAWDDSLNGWV   | 11     | +          | -    | -        |
| neWAS03p 15   | 3-9    | 3-10 | 3  | 3  | DTRTITMVRSPFDI         | 15     | 2-14           | 2              | SSYTSSSTLV    | 10     | -          | -    | -        |
| neWAS03p 17 # | 3-48   | 4-17 | 2  | 4  | NYGGDY                 | 6      | 1-44           | 7              | AAWDDSLNGAV   | 11     |            |      |          |
| neWAS03p 19   | 3-15   | 6-13 | 3  | 6  | ARIAAAPYYYYYGMV        | 17     | 2-14           | 2              | SSYTSSSTHV    | 11     | -          | -    | -        |
| neWAS03p 22 # | 3-30   | 2-15 | 2  | 4  | GGNEPPSYCSGGSCYSYGFDFY | 21     | 2-11           | 1              | CSYAGSYTFV    | 10     |            |      |          |
| neWAS03p 27 # | 3-23   | 2-21 | 2  | 5  | VGSHCYEV               | 8      | 2-11           | 1              | CSYAGSYTFV    | 10     |            |      |          |
| neWAS03p 29   | 3-11   | 4-23 | 2  | 4  | ADYGGNSAGLQNFDFY       | 15     | 2-14           | 1              | SSYTSSSTLKV   | 11     | -          | -    | -        |
| neWAS03p 30   | 1-18   | 6-13 | 3  | 4  | KPIAAAGTGWVVDY         | 14     | 1-51           | 3              | GTWDDSLSAGE   | 11     | -          | -    | -        |
| neWAS03p 31   | 3-30   | 6-13 | 2  | 4  | GLSGISSFNLDY           | 12     | 2-14           | 1              | SSYTSSSTLV    | 10     | -          | -    | -        |
| neWAS03p 32   | 3-23   | 2-15 | 3  | 4  | DLFTEPSDIVVVAATPLDY    | 20     | 1-51           | 2              | GTWDDSLSAGV   | 11     | -          | -    | -        |
| neWAS03p 36   | 3-13   | 6-19 | 3  | 3  | VRAGSADAFDI            | 11     | 1-44           | 7              | AAWDDSLNGPV   | 11     | -          | -    | -        |
| neWAS03p 37   | 3-30   | 2-21 | 2  | 6  | DILRTNCGGDCYSPYYGMDV   | 20     | 1-51           | 2              | GTWDDSLSAGV   | 11     | -          | +    | -        |
| neWAS03p 39 # | 3-30   | 3-10 | 2  | 6  | CSYSGSYTANYYYYYGMDV    | 20     | 2-8            | 1              | SSYAGSNNLS    | 10     |            |      |          |
| neWAS03p 41   | 4-59   | 1-26 | 2  | 4  | GPGVSGSYSFDFY          | 12     | 2-14           | 3              | SSYTSSSTWV    | 10     | -          | -    | -        |
| neWAS03p 48   | 4-59   | 4-17 | 2  | 3  | EGWDYGDYHGAFDI         | 14     | 1-44           | 3              | AAWDDSLNGWV   | 11     | -          | -    | -        |
| neWAS03p 12   |        |      |    |    |                        |        | 3-21           | 1              | QWDDSSSDHPGYV | 13     |            |      |          |
| neWAS03p 44   |        |      |    |    |                        |        | 7-43           | 2              | LLYGGDRV      | 9      |            |      |          |

RF, reading frame; #, antibody failed to be expressed; -, non-reactive; +, reactive;

C, diffuse cytoplasmic staining; N, nuclear staining; F, cytoplasmic fibers

**Table S15:** Repertoire and reactivity of antibodies from new emigrant B cells of WAS patient 4 after GT

| Ig            | HEAVY  |      |    |    |                        |        | LIGHT |    |              |        | REACTIVITY |      |          |
|---------------|--------|------|----|----|------------------------|--------|-------|----|--------------|--------|------------|------|----------|
|               | VH     | D    | RF | JH | CDR3(aa)               | Length | Vκ    | Jκ | CDR3 (aa)    | Length | Poly       | HEp2 | Staining |
| neWAS04p 01 # | 3-21   | 6-6  | 3  | 5  | GGIWGIAARPSWFDP        | 15     | 1-39  | 5  | QQSYSTPPTT   | 10     |            |      |          |
| neWAS04p 04   | 3-23   | 1-26 | 3  | 4  | APYRSSWVGAVHPDY        | 16     | 2-30  | 4  | MQGTHWPLT    | 9      | -          | -    | -        |
| neWAS04p 09 # | 3-11   | 6-6  | 3  | 4  | SSIAEDY                | 7      | 3-20  | 4  | QQYGSSPRLT   | 10     |            |      |          |
| neWAS04p 14 # | 3-9    | 3-3  | 2  | 5  | GDPWSDSPGFDP           | 12     | 1-17  | 2  | LQHNSYPYT    | 9      |            |      |          |
| neWAS04p 16 # | 5-51   | 2-15 | 2  | 4  | GACSGGSCQGLLDY         | 14     | 1-5   | 1  | QQYNIYWTAQAQ | 11     |            |      |          |
| neWAS04p 22 # | 3-30-3 | 5-5  | 3  | 5  | TLYTAMVTRLGP           | 12     | 3-15  | 1  | QQYNNWPTWT   | 10     |            |      |          |
| neWAS04p 27   | 1-24   | 1-26 | 2  | 4  | DLSSGSYGKGGGFDP        | 15     | 1-5   | 1  | QQYNSYSWT    | 9      | +          | +    | C        |
| neWAS04p 28   | 4-b    | 5-5  | 3  | 4  | DTAMVTRFY              | 10     | 3-11  | 5  | QQRSNWPPIT   | 10     | -          | +    | -        |
| neWAS04p 29 # | 3-7    | 6-19 | 3  | 3  | EGVAVAGTGAVAFDI        | 15     | 3-15  | 4  | QQYNNWPPPLT  | 10     |            |      |          |
| neWAS04p 30   | 3-21   | 1-26 | 2  | 1  | VGNSGSYYNGYFQH         | 14     | 3-20  | 2  | QQYGSSPRT    | 9      | -          | +    | -        |
| neWAS04p 32   | 3-15   | 3-22 | 2  | 4  | ASLDYDSSGYQDFDY        | 15     | 1-8   | 4  | QQYYSYPLT    | 9      | -          | +    | -        |
| neWAS04p 33   | 3-30-3 | 3-3  | 2  | 4  | DFWSGYYFDY             | 10     | 1-27  | 3  | QKYNAPFT     | 9      | -          | +    | -        |
| neWAS04p 34   | 4-b    | /    | /  | 1  | GRGNPPAYEPQH           | 12     | 2-28  | 4  | MQALQTPKLT   | 10     | -          | -    | -        |
| neWAS04p 35 # | 3-30-3 | 1-26 | 2  | 4  | GRGGSYYHFDY            | 11     | 2-29  | 4  | LQSIQLPLT    | 9      |            |      |          |
| neWAS04p 38   | 3-30   | 6-19 | 3  | 3  | VRIAVAAYDAFDI          | 13     | 1-12  | 4  | QQANSFPPT    | 9      | -          | -    | -        |
| neWAS04p 42 # | 3-15   | 5-24 | 1  | 2  | VGRWLQLRPNWYFDL        | 15     | 3-20  | 2  | QQYGSSPPFT   | 10     |            |      |          |
| neWAS04p 43   | 4-30-2 | /    | /  | 3  | VGVTGAKAFDI            | 11     | 1-33  | 4  | QQYDNLPLT    | 9      | -          | +    | -        |
| neWAS04p 44   | 3-30-3 | 1-26 | 3  | 4  | EYVSIGVGATSYFDY        | 15     | 1-39  | 4  | QQSYSTLLT    | 9      | -          | -    | -        |
| neWAS04p 10   | 4-59   | /    | /  | 6  | AYIVADYGGMDV           | 13     |       |    |              |        |            |      |          |
| neWAS04p 11   | 4-34   | 2-15 | 2  | 3  | GGPYCSGGSCYSGSGHTDAFDI | 22     |       |    |              |        |            |      |          |
| neWAS04p 13   | 1-2    | 3-22 | 2  | 5  | VLKGYDDSSGPNWFDP       | 17     |       |    |              |        |            |      |          |
| neWAS04p 23   | 1-46   | 3-22 | 3  | 5  | ASMIGGGRNWFDP          | 13     |       |    |              |        |            |      |          |
| neWAS04p 24   | 3-11   | 3-9  | 2  | 4  | TYDDRKKISTTDY          | 14     |       |    |              |        |            |      |          |
| neWAS04p 25   | 3-23   | 4-17 | 2  | 4  | DLSYGDYFDY             | 11     |       |    |              |        |            |      |          |
| neWAS04p 08   |        |      |    |    |                        |        | 1-17  | 4  | LQHNSYPLT    | 9      |            |      |          |
| neWAS04p 37   |        |      |    |    |                        |        | 3-15  | 1  | QQYNNWRRRT   | 9      |            |      |          |
|               | VH     | D    | RF | JH | CDR3(aa)               | Length | Vλ    | Jλ | CDR3 (aa)    | Length | Poly       | HEp2 | Staining |
| neWAS04p 02 # | 1-18   | 1-26 | 2  | 5  | DGGGSYYF               | 8      | 2-23  | 2  | CSYAGSSTPVV  | 11     |            |      |          |
| neWAS04p 03 # | 4-39   | 3-22 | 2  | 3  | DLGSFGAYDSSGYYPGDAFDI  | 22     | 1-40  | 3  | QSYDSSLGSGV  | 11     |            |      |          |
| neWAS04p 05   | 3-9    | 4-17 | 2  | 3  | AHDYGDYGETGVVAFDI      | 17     | 2-23  | 2  | CSYAGSHVV    | 9      | -          | -    | -        |
| neWAS04p 06   | 3-15   | 4-23 | 2  | 4  | ARIPYGGNRQGSYD         | 14     | 1-51  | 3  | GTWDSLSAWV   | 11     | +          | +    | -        |
| neWAS04p 07   | 4-30-2 | 3-16 | 1  | 2  | VGGLRPRGLYWYFDL        | 15     | 3-21  | 2  | QVWDSDDHVV   | 11     | +          | -    | -        |
| neWAS04p 12   | 3-30   | 4-17 | 3  | 4  | TTVTKSFYD              | 9      | 3-21  | 1  | QVWDSDDHYV   | 11     | -          | -    | -        |
| neWAS04p 15 # | 3-66   | 6-13 | 3  | 6  | DQVWAAAGPRPYYYYGGMDV   | 20     | 1-51  | 1  | GTWDSLSAYV   | 11     |            |      |          |
| neWAS04p 17 # | 4-30-4 | 3-10 | 3  | 4  | ARVVRGVIPIFDY          | 12     | 1-44  | 2  | AAWDDSLNGYVV | 12     |            |      |          |
| neWAS04p 18 # | 3-21   | /    | /  | 2  | DLRATTLGWYFDL          | 13     | 2-11  | 3  | CSYAGSYTWV   | 10     |            |      |          |
| neWAS04p 28   | 3-64   | 4-17 | 2  | 3  | KGRLNGDYESCAFDI        | 15     | 2-14  | 2  | SSYTSSSTLEV  | 11     | -          | -    | -        |
| neWAS04p 36   | 3-49   | 5-5  | 2  | 2  | VQGYSGLYWYFDL          | 14     | 3-21  | 3  | QVWDSDDL     | 10     | -          | +    | -        |
| neWAS04p 40   | 3-11   | 6-19 | 3  | 4  | LVAVAGDFDY             | 10     | 3-21  | 2  | QVWDSDDHPVV  | 12     | -          | -    | -        |
| neWAS04p 41 # | 3-30   | 3-22 | 2  | 5  | DRLTYDDSSGSLSG         | 15     | 3-21  | 2  | QVWDSRGV     | 8      |            |      |          |
| neWAS04p 46   | 3-30-3 | 5-24 | 1  | 3  | AWRWLQFGGELDI          | 13     | 2-14  | 2  | SSYTSSSSV    | 10     | -          | -    | -        |
| neWAS04p 48   | 4-61   | /    | /  | 4  | DPLPYNSGFYD            | 11     | 2-23  | 2  | CSYAGSSTHVV  | 11     | -          | -    | -        |
| neWAS04p 20   |        |      |    |    |                        |        | 3-21  | 2  | QVWDSDDVV    | 10     |            |      |          |
| neWAS04p 31   |        |      |    |    |                        |        | 3-25  | 2  | QSADSSGTVV   | 10     |            |      |          |
| neWAS04p 39   |        |      |    |    |                        |        | 1-40  | 1  | QSYDSSLGYYV  | 11     |            |      |          |
| neWAS04p 42   |        |      |    |    |                        |        | 3-21  | 2  | QVWDSDDHLV   | 11     |            |      |          |

RF, reading frame; #, antibody failed to be expressed; -, non-reactive; +, reactive;

C, diffuse cytoplasmic staining; N, nuclear staining; F, cytoplasmic fibers



**Table S16:** Repertoire and reactivity of antibodies from mature naïve B cells of WAS patient 1 after GT

| Ig            | HEAVY |      |    |    |                       |        | LIGHT |    |             |        | REACTIVITY |      |          |
|---------------|-------|------|----|----|-----------------------|--------|-------|----|-------------|--------|------------|------|----------|
|               | VH    | D    | RF | JH | CDR3(aa)              | Length | Vκ    | Jκ | CDR3 (aa)   | Length | Poly       | HEp2 | Staining |
| mnWAS01p 55 # | 3-33  | 3-3  | 3  | 4  | DRITIFGVVKKFDY        | 14     | 1-17  | 1  | LQHNSYPLA   | 9      |            |      |          |
| mnWAS01p 58 # | 1-46  | 3-22 | 3  | 4  | SWGSVVITDDFDY         | 13     | 1-39  | 1  | QQSYSTPWT   | 9      |            |      |          |
| mnWAS01p 61   | 3-30  | 3-22 | 2  | 3  | DQAPSSSGYPHDAFDI      | 16     | 3-15  | 4  | QQYNNWPLT   | 9      | -          | -    | -        |
| mnWAS01p 65   | 3-48  | 3-22 | 2  | 6  | DAYYDSSGYNNYYYYGMDV   | 20     | 3-11  | 5  | QQRSNWPPIT  | 10     | -          | -    | -        |
| mnWAS01p 67 # | 3-33  | 4-23 | 2  | 4  | DLGDYGGNSVVY          | 12     | 2-28  | 1  | MQALQTHWT   | 9      |            |      |          |
| mnWAS01p 69   | 3-48  | 5-5  | 1  | 6  | DRVWLSGYYYYGMDV       | 15     | 1-5   | 1  | QQYNSYPWT   | 9      | +          | +    | C        |
| mnWAS01p 82   | 1-46  | 5-12 | 3  | 6  | GDIVATIISHYYYYGMDV    | 18     | 1-33  | 2  | QQYDNLPLT   | 9      | -          | -    | -        |
| mnWAS01p 95   | 1-69  | 3-9  | 2  | 4  | GYPNYDILTGYSFDY       | 15     | 2-28  | 1  | MQALQTHWT   | 9      | +          | +    | C        |
| mnWAS01p 71   | 1-18  | 3-10 | 2  | 6  | DLVYYYDSSYYYYYGGMDV   | 19     |       |    |             |        |            |      |          |
| mnWAS01p 78   | 3-21  | 3-3  | 2  | 6  | DHLDFWQRGYYYYGMDV     | 16     |       |    |             |        |            |      |          |
| mnWAS01p 93   | 3-53  | 1-20 | 2  | 4  | GWNWNSRH              | 9      |       |    |             |        |            |      |          |
| mnWAS01p 94   | 1-24  | 3-16 | 1  | 4  | IFRDLRLGELSLYGAPFDY   | 19     |       |    |             |        |            |      |          |
| mnWAS01p 74   |       |      |    |    |                       |        | 1-5   | 1  | QQYNSYWT    | 8      |            |      |          |
|               | VH    | D    | RF | JH | CDR3(aa)              | Length | Vλ    | Jλ | CDR3 (aa)   | Length | Poly       | HEp2 | Staining |
| mnWAS01p 51   | 3-64  | 5-24 | 2  | 4  | GDGYSLDY              | 8      | 2-14  | 2  | SSYTSSINVV  | 10     | -          | -    | -        |
| mnWAS01p 62   | 3-23  | 4-17 | 2  | 6  | FGIDYGDYRGPNNYYYYGMDV | 21     | 3-1   | 2  | QAWDSSTEVV  | 10     | -          | -    | -        |
| mnWAS01p 63   | 4-b   | 2-2  | 3  | 5  | VGRDIVVPAAIRRNWFDP    | 20     | 1-47  | 3  | AAWDDSLSGPV | 11     | -          | -    | -        |
| mnWAS01p 68   | 3-21  | 2-21 | 2  | 3  | DDVLDCGGDCYSPDAFDI    | 18     | 2-14  | 2  | SSYTSSSTLVV | 11     | -          | +    | -        |
| mnWAS01p 70   | 5-51  | 6-19 | 2  | 4  | RSSGWGGNDY            | 10     | 3-21  | 1  | QVWDSSTDHYV | 11     | -          | -    | -        |
| mnWAS01p 74   | 4-34  | 4-17 | 3  | 4  | GVTVTTRGDFD           | 11     | 1-40  | 3  | QSYDSSLGSGV | 11     | -          | -    | -        |
| mnWAS01p 75   | 4-59  | 7-27 | 2  | 5  | VSNWGPWFDP            | 11     | 1-40  | 1  | QSYDSSLGSGV | 11     | -          | -    | -        |
| mnWAS01p 85   | 1-18  | 6-13 | 2  | 6  | ASSWYVPPYYGMDV        | 15     | 1-44  | 3  | AAWDDSLNGLV | 11     | -          | -    | -        |
| mnWAS01p 88   | 3-21  | 3-3  | 2  | 4  | YNGDDSSGYPRPFDY       | 16     | 3-21  | 1  | QVWDSSTDHYV | 11     | -          | -    | -        |
| mnWAS01p 90   | 1-24  | 3-10 | 2  | 6  | DLISWTPHGSMDV         | 14     | 1-44  | 3  | AAWDDSLNGPV | 11     | -          | -    | -        |
| mnWAS01p 92   | 1-69  | 3-10 | 1  | 6  | DSRFGDYYYYGMDV        | 15     | 3-21  | 2  | QVWDSSTDHVV | 11     | -          | -    | -        |
| mnWAS01p 96   | 1-69  | 2-21 | 3  | 6  | GVVVTATDYYYYGMDV      | 16     | 1-51  | 3  | GTWDSLSAWV  | 11     | -          | +    | -        |
| mnWAS01p 57   |       |      |    |    |                       |        | 3-21  | 3  | QVWDSSTDHWV | 11     |            |      |          |

RF, reading frame; #, antibody failed to be expressed; -, non-reactive; +, reactive;

C, diffuse cytoplasmic staining; N, nuclear staining; F, cytoplasmic fibers

**Table S17:** Repertoire and reactivity of antibodies from mature naïve B cells of WAS patient 2 after GT

| Ig            | HEAVY |      |    |    |                       |        | LIGHT |    |              |        | REACTIVITY |      |          |
|---------------|-------|------|----|----|-----------------------|--------|-------|----|--------------|--------|------------|------|----------|
|               | VH    | D    | RF | JH | CDR3(aa)              | Length | Vκ    | Jκ | CDR3 (aa)    | Length | Poly       | HEp2 | Staining |
| mnWAS02p 50   | 3-15  | 4-17 | 2  | 6  | YGDYDAGGYYYGGMDV      | 16     | 3-20  | 1  | QQYGSSPLT    | 9      | -          | -    | -        |
| mnWAS02p 53   | 3-23  | 3-3  | 3  | 4  | DGRTIFDY              | 8      | 3-15  | 1  | QQYNNWPPWT   | 10     | -          | -    | -        |
| mnWAS02p 56 # | 4-34  | 6-13 | 3  | 6  | GPPGIAAAGTGDRYYYYGMDV | 21     | 1-9   | 5  | QQLNSYPIT    | 9      |            |      |          |
| mnWAS02p 62   | 4-34  | 6-13 | 2  | 4  | GRPVHNSSSWFFFDY       | 15     | 4-1   | 4  | QQYYSTPIT    | 9      | -          | -    | -        |
| mnWAS02p 64   | 1-24  | /    | /  | 3  | DYRLYAFDI             | 9      | 3-20  | 2  | QQYGSSRT     | 8      | -          | -    | -        |
| mnWAS02p 65 # | 3-23  | 3-10 | 2  | 4  | QYYYDSSSYPLSDY        | 14     | 3-11  | 1  | QQRINWPRT    | 9      |            |      |          |
| mnWAS02p 68   | 3-30  | 1-26 | 2  | 4  | GGSGSYRPLGDY          | 12     | 1-33  | 2  | QQYDNLIMYT   | 10     | -          | -    | -        |
| mnWAS02p 71   | 1-8   | 4-17 | 2  | 5  | VTPDGDGRGRVRFWFD      | 17     | 1-33  | 5  | QQYDNLIPIT   | 9      | -          | -    | -        |
| mnWAS02p 72   | 3-11  | 2-15 | 2  | 4  | GYCSGGSCYVGGMYFDY     | 17     | 1-39  | 3  | QQSYSTPRT    | 9      | -          | -    | -        |
| mnWAS02p 74   | 4-31  | /    | /  | 3  | DPPDDDAFDI            | 10     | 1-39  | 1  | QQSYSTPWT    | 9      | -          | -    | -        |
| mnWAS02p 87 # | 1-24  | 3-22 | 2  | 3  | QTSTYYYDSSGYHDAFDI    | 18     | 3-11  | 3  | QQRSNWPLIFT  | 11     |            |      |          |
| mnWAS02p 88 # | 3-11  | 3-10 | 2  | 4  | PYGGSGYTERAADY        | 14     | 1-12  | 4  | QRVNRYPPT    | 9      |            |      |          |
| mnWAS02p 90   | 3-7   | 6-13 | 3  | 4  | GAAVDY                | 7      | 4-1   | 2  | QQYYSTPPYT   | 10     | -          | -    | -        |
| mnWAS02p 93   | 1-69  | 6-13 | 2  | 6  | SSSWFDYGGMDV          | 13     | 2-30  | 1  | MQGTHWPQT    | 9      | -          | -    | -        |
| mnWAS02p 63   | 3-7   | 6-13 | 3  | 4  | TSLAAAGTWGILGY        | 14     |       |    |              |        |            |      |          |
| mnWAS02p 78   | 1-69  | 2-2  | 2  | 5  | DVRLGYCSSTSCPPENWFD   | 20     |       |    |              |        |            |      |          |
| mnWAS02p 95   | 1-69  | 5-24 | 3  | 3  | DPVEMATINAFDI         | 13     |       |    |              |        |            |      |          |
| mnWAS02p 49   |       |      |    |    |                       |        | 1-5   | 1  | QQYNSYSRT    | 9      |            |      |          |
| mnWAS02p 59   |       |      |    |    |                       |        | 3-15  | 5  | QQYNNWPPIT   | 10     |            |      |          |
| mnWAS02p 92   |       |      |    |    |                       |        | 1-5   | 4  | QQYNSYPLT    | 9      |            |      |          |
|               | VH    | D    | RF | JH | CDR3(aa)              | Length | Vλ    | Jλ | CDR3 (aa)    | Length | Poly       | HEp2 | Staining |
| mnWAS02p 51   | 3-21  | 3-3  | 3  | 6  | RGVGDYYYGMDV          | 12     | 3-25  | 1  | QSADSSGTYV   | 10     | -          | -    | -        |
| mnWAS02p 54   | 1-2   | 1-26 | 3  | 1  | AIVGATSEYFQH          | 12     | 3-21  | 1  | QVWDSSSDHYV  | 11     | -          | -    | -        |
| mnWAS02p 58   | 4-39  | 3-3  | 2  | 5  | HAYYDFWSGYYIPGWFD     | 18     | 3-9   | 3  | QVWDSSSTAWV  | 10     | +          | +    | C        |
| mnWAS02p 59   | 3-23  | 6-13 | 1  | 5  | QQLVSRWFD             | 10     | 3-14  | 2  | SSYSSSTLVV   | 11     | -          | -    | -        |
| mnWAS02p 69   | 1-2   | 3-22 | 2  | 4  | DEYYDSSGYNY           | 13     | 2-14  | 3  | SSYSSSTLGV   | 11     | -          | +    | -        |
| mnWAS02p 75   | 3-7   | 3-10 | 2  | 3  | DNYGSGSYHNSDAFDI      | 16     | 2-14  | 3  | SSYSSSTLV    | 10     | -          | -    | -        |
| mnWAS02p 83 # | 3-15  | 5-5  | 3  | 2  | VNPDTAMVFRYFDL        | 14     | 2-14  | 3  | SSYSSSTL     | 9      |            |      |          |
| mnWAS02p 85   | 1-69  | 2-2  | 3  | 6  | VGDPVVPAAFDYGGMDV     | 22     | 2-8   | 2  | SSYAGSNNLV   | 10     | +          | +    | C        |
| mnWAS02p 91   | 4-39  | 4-17 | 2  | 5  | VYGDYDDWFD            | 11     | 1-40  | 1  | QSYDSSLSGLYV | 12     | -          | -    | -        |

RF, reading frame; #, antibody failed to be expressed; -, non-reactive; +, reactive;

C, diffuse cytoplasmic staining; N, nuclear staining; F, cytoplasmic fibers

**Table S18:** Repertoire and reactivity of antibodies from mature naïve B cells of WAS patient 3 after GT

| Ig            | HEAVY  |      |    |    |                         |        | LIGHT          |                |             |        | REACTIVITY |      |          |
|---------------|--------|------|----|----|-------------------------|--------|----------------|----------------|-------------|--------|------------|------|----------|
|               | VH     | D    | RF | JH | CDR3(aa)                | Length | V <sub>k</sub> | J <sub>k</sub> | CDR3 (aa)   | Length | Poly       | HEp2 | Staining |
| mnWAS03p 49 # | 1-69   | 2-21 | 3  | 2  | SVVVTAIHSYWYFDL         | 15     | 3-20           | 2              | QQYGSSSYT   | 9      |            |      |          |
| mnWAS03p 50   | 3-23   | /    | /  | 4  | WRRSYFDY                | 8      | 1-17           | 4              | LQHNSYPLT   | 9      | +          | -    | -        |
| mnWAS03p 51   | 4-34   | 3-10 | 2  | 4  | GNRGWRGSGSDYFDY         | 15     | 3-11           | 3              | HQRSNWPPPT  | 10     | -          | -    | -        |
| mnWAS03p 52   | 3-30   | 6-6  | 2  | 4  | QSGESSSEVWRYFDY         | 15     | 1-39           | 1              | QRSYSTPRT   | 9      | -          | -    | -        |
| mnWAS03p 54 # | 3-9    | 3-22 | 3  | 3  | DFGLGVITDDVAFDI         | 15     | 1-39           | 1              | QSYSTPWT    | 9      |            |      |          |
| mnWAS03p 55   | 4-59   | 3-3  | 2  | 4  | TKTDFWSGYPPSSPYFDY      | 18     | 4-1            | 1              | QYYSTPWT    | 9      | +          | +    | -        |
| mnWAS03p 56 # | 3-30-3 | 4-17 | 2  | 3  | PRDYGDYDHGLLDAFDI       | 17     | 2-28           | 4              | MQALQTPLT   | 9      |            |      |          |
| mnWAS03p 58   | 3-30   | 4-17 | 2  | 4  | GYGDYFDY                | 8      | 3-11           | 1              | QQRSNWPSWT  | 10     | -          | -    | -        |
| mnWAS03p 61   | 4-34   | 6-6  | 1  | 4  | KGEQLSFDY               | 9      | 3-15           | 2              | QQYNNWPYT   | 9      | -          | -    | -        |
| mnWAS03p 63   | 4-4    | 6-13 | 2  | 1  | DGPSTSWYNYFQH           | 13     | 1-9            | 2              | QQLNSYPRT   | 9      | -          | +    | -        |
| mnWAS03p 67   | 3-33   | 6-19 | 2  | 4  | DRSGWYFY                | 8      | 3-15           | 4              | QRYNNWPPLT  | 10     | -          | -    | -        |
| mnWAS03p 71   | 4-34   | 5-5  | 3  | 4  | VPLLGDTAMGLDY           | 13     | 1-16           | 3              | QQYNSYPRT   | 9      | -          | -    | -        |
| mnWAS03p 73   | 1-46   | 5-5  | 2  | 5  | DRVEYSYGPFYD            | 12     | 3-20           | 2              | QQYGSSSYT   | 9      | -          | -    | -        |
| mnWAS03p 74   | 4-34   | 6-19 | 3  | 4  | VAGSTDGKGIAGVATYFDY     | 19     | 3-11           | 4              | QQRSNWPLT   | 9      | -          | -    | -        |
| mnWAS03p 75   | 3-15   | 7-27 | 1  | 2  | ARELGHWYFDL             | 12     | 1-39           | 2              | QSYSTPYT    | 9      | -          | -    | -        |
| mnWAS03p 77   | 4-4    | 3-9  | 1  | 4  | NRVRYFGGKGRETLDY        | 17     | 1-33           | 3              | QQYDNLPH    | 9      | -          | +    | N        |
| mnWAS03p 79   | 3-30-3 | 3-3  | 2  | 2  | EGPYDFWSGYFFFRYGYFDL    | 20     | 4-1            | 1              | QYYSTPT     | 8      | -          | -    | -        |
| mnWAS03p 81   | 1-f    | 5-5  | 2  | 4  | PGTGYSYGLVAYHFDY        | 16     | 2-28           | 1              | MQALQTPPT   | 9      | -          | -    | -        |
| mnWAS03p 85   | 4-34   | 6-19 | 2  | 4  | ARSRGWYGFYFDY           | 14     | 3-15           | 4              | QQYNNWVLT   | 9      | +          | +    | C        |
| mnWAS03p 86   | 4-34   | 3-10 | 2  | 4  | GWGGSYSGSSDY            | 14     | 1-17           | 1              | LQHNSYPLA   | 9      | -          | -    | -        |
| mnWAS03p 89 # | 1-58   | 6-13 | 1  | 6  | DRGIGQQLAVYYYYGMDV      | 18     | 1-17           | 2              | LQHNSYPT    | 9      |            |      |          |
| mnWAS03p 93 # | 1-8    | 3-22 | 2  | 6  | ANYDSSGYSSYYYGMDV       | 19     | 2-30           | 2              | MQGTHWPPYT  | 10     |            |      |          |
| mnWAS03p 53   | 4-34   | 6-19 | 3  | 4  | GIAVAGVFDY              | 10     |                |                |             |        |            |      |          |
| mnWAS03p 80   | 4-39   | 6-19 | 2  | 4  | VSMYSSGWYSLPYFDY        | 17     |                |                |             |        |            |      |          |
| mnWAS03p 83   | 3-30   | 3-9  | 2  | 3  | PQVHDILTGYLKGDAFDI      | 20     |                |                |             |        |            |      |          |
| mnWAS03p 84   | 1-69   | 6-6  | 2  | 2  | SSYSSSARYFDL            | 13     |                |                |             |        |            |      |          |
| mnWAS03p 89   | 1-58   | 6-13 | 1  | 6  | DRGIGQQLAVYYYYGMDV      | 18     |                |                |             |        |            |      |          |
| mnWAS03p 90   | 3-23   | 6-19 | 2  | 4  | GKWPEHSGWDPDF           | 14     |                |                |             |        |            |      |          |
|               | VH     | D    | RF | JH | CDR3(aa)                | Length | V <sub>λ</sub> | J <sub>λ</sub> | CDR3 (aa)   | Length | Poly       | HEp2 | Staining |
| mnWAS03p 57 # | 3-30   | 3-22 | 2  | 6  | DGVGGYYDSSGYWERYYYYGMDV | 24     | 2-11           | 1              | CSYAGSYTFV  | 10     |            |      |          |
| mnWAS03p 60   | 3-21   | 5-5  | 1  | 4  | EWIQLWLQIDY             | 11     | 1-44           | 3              | AAWDDSLNGWV | 11     | -          | -    | -        |
| mnWAS03p 66   | 4-34   | 6-13 | 3  | 3  | GSRVAAAGTDAFDI          | 14     | 5-37           | 1              | MIWPSNASLYV | 11     | -          | -    | -        |
| mnWAS03p 69   | 3-9    | 7-27 | ?  | 4  | PTRSEPGDDTFDY           | 13     | 3-21           | 1              | QVWDSSSDYV  | 10     | -          | -    | -        |
| mnWAS03p 72   | 3-9    | 5-5  | 2  | 4  | DIYSYGSSPDY             | 11     | 2-14           | 1              | SSYSSSYV    | 10     | -          | -    | -        |
| mnWAS03p 87   | 4-34   | 2-15 | 3  | 5  | RPDIVVVAATTGGWFDP       | 18     | 2-8            | 2              | SSYAGSNEVV  | 10     | -          | -    | -        |
| mnWAS03p 88   | 3-48   | 6-19 | 2  | 5  | DSGWSPGWFD              | 11     | 3-21           | 2              | QVWDSSSDHVV | 11     | -          | -    | -        |
| mnWAS03p 91   | 4-34   | 3-10 | 2  | 4  | GYGSGSYSSYFDY           | 14     | 2-11           | 2              | CSYAGSYFV   | 10     | -          | -    | -        |
| mnWAS03p 92   | 4-34   | /    | /  | 3  | GAFDI                   | 6      | 1-44           | 3              | AAWDDSLNGRV | 11     | -          | -    | -        |
| mnWAS03p 95   | 3-30-3 | 6-19 | 3  | 5  | DLLDYSVAGTS             | 11     | 1-51           | 2              | GTWDSLSAGRV | 12     | +          | +    | -        |
| mnWAS03p 75   |        |      |    |    |                         |        | 1-44           | 1              | AAWDDSLNGYV | 11     |            |      |          |
| mnWAS03p 96   |        |      |    |    |                         |        | 2-23           | 2              | CSYAGSSTVV  | 10     |            |      |          |

RF, reading frame; #, antibody failed to be expressed; -, non-reactive; +, reactive;

C, diffuse cytoplasmic staining; N, nuclear staining; F, cytoplasmic fibers

**Table S19:** Repertoire and reactivity of antibodies from mature naïve B cells of WAS patient 4 after GT

| Ig            | HEAVY  |      |    |    |                       |        | LIGHT |    |              |        | REACTIVITY |      |          |
|---------------|--------|------|----|----|-----------------------|--------|-------|----|--------------|--------|------------|------|----------|
|               | VH     | D    | RF | JH | CDR3(aa)              | Length | Vκ    | Jκ | CDR3 (aa)    | Length | Poly       | HEp2 | Staining |
| mnWAS04p 51   | 1-69   | 3-22 | 2  | 6  | RYYDSSGPDFSHSYYYYGMDV | 21     | 2-28  | 5  | MQALQTPGT    | 9      | -          | -    | -        |
| mnWAS04p 53   | 3-9    | 1-26 | 2  | 6  | ANHDSGSYSSYYGMDV      | 17     | 2-28  | 1  | MQALQTPWT    | 9      | -          | -    | -        |
| mnWAS04p 57   | 1-69   | 1-26 | 1  | 5  | ATLKWELLEYNWFDP       | 15     | 1-33  | 4  | QQYDNLPLT    | 9      | -          | -    | -        |
| mnWAS04p 58   | 4-34   | 5-5  | 3  | 4  | GRDTAMALYYFDY         | 13     | 3-11  | 2  | QQRNSYNT     | 8      | -          | -    | -        |
| mnWAS04p 59   | 3-21   | /    | /  | 4  | PFGQLDNY              | 8      | 2-28  | 2  | MQALQTRYT    | 9      | -          | -    | -        |
| mnWAS04p 60   | 4-30-4 | 3-9  | 2  | 4  | VPNYDILTYTY           | 11     | 1-33  | 5  | QQYDNLPLT    | 9      | +          | +    | C        |
| mnWAS04p 63   | 1-69   | 1-26 | 3  | 6  | IVGATVYYYYGMDV        | 15     | 3-11  | 5  | QQRSTWFT     | 8      | -          | -    | -        |
| mnWAS04p 64   | 3-30   | 3-22 | 2  | 4  | LGADSSGYPPFDY         | 13     | 1-17  | 3  | LQHNSYPFT    | 9      | -          | -    | -        |
| mnWAS04p 65 # | 3-30   | 1-26 | 2  | 6  | GDSGSYPPFDYYYYYGMDV   | 19     | 3-11  | 4  | QQRSNWPLT    | 9      |            |      |          |
| mnWAS04p 70 # | 4-34   | 5-5  | 2  | 4  | VRGYSYGPFDY           | 11     | 1-33  | 1  | QQYDNLPLT    | 9      |            |      |          |
| mnWAS04p 73   | 1-69   | 3-22 | 2  | 6  | GYDSSGYRAYYYYYGMDV    | 19     | 3-20  | 1  | QQYGSPPGT    | 9      | -          | -    | -        |
| mnWAS04p 75   | 1-24   | 6-19 | 2  | 3  | DLGWGGWHDAFDI         | 13     | 3-15  | 1  | QQYNNWPKT    | 9      | -          | -    | -        |
| mnWAS04p 79   | 4-30-4 | 3-16 | 2  | 6  | CPLPFLGSYGRLSGAEDGMDV | 21     | 1-39  | 2  | QQSYSTPYT    | 9      | -          | +    | -        |
| mnWAS04p 80 # | 3-11   | 6-19 | 3  | 2  | DHEPAVAPIFYWYFDL      | 16     | 3-11  | 4  | QQRSNWPLT    | 10     |            |      |          |
| mnWAS04p 84   | 1-69   | 4-17 | 2  | 3  | DRYRYGAHSAFDI         | 14     | 1-33  | 3  | QQYDNLPLT    | 9      | -          | -    | -        |
| mnWAS04p 85 # | 1-18   | 3-16 | 2  | 4  | DESYDVVWGSYRYFDY      | 16     | 3-11  | 5  | QQRSNWPLIT   | 11     |            |      |          |
| mnWAS04p 86 # | 3-9    | 3-22 | 2  | 3  | DPHYDSDNHDAFDI        | 14     | 3-20  | 2  | QQYGSPPSYT   | 11     |            |      |          |
| mnWAS04p 88   | 3-23   | 3-3  | 2  | 4  | DYYDFWPPYFDY          | 12     | 1-5   | 2  | QQYNSYSSYT   | 10     | -          | -    | -        |
| mnWAS04p 90   | 3-30-3 | 1-7  | 2  | 4  | VNWNYPAGDYFDY         | 14     | 1-33  | 1  | QHQT         | 5      | -          | -    | -        |
| mnWAS04p 91   | 5-51   | 4-4  | 2  | 4  | PRGSYSNYFDY           | 12     | 3-15  | 2  | QQYNNWPEKYT  | 12     | -          | -    | -        |
| mnWAS04p 49   | 4-b    | 6-19 | 3  | 5  | DLGLAVAGRIVNWFDP      | 17     |       |    |              |        |            |      |          |
| mnWAS04p 54   | 1-2    | 6-19 | 3  | 4  | IADVDPFDY             | 9      |       |    |              |        |            |      |          |
| mnWAS04p 83   | 1-18   | 6-6  | 3  | 4  | SIATIDY               | 8      |       |    |              |        |            |      |          |
| mnWAS04p 56   |        |      |    |    |                       |        | 3-11  | 1  | QQRSNWPPSWT  | 11     |            |      |          |
| mnWAS04p 89   |        |      |    |    |                       |        | 3-20  | 1  | QQYGSPLYT    | 9      |            |      |          |
|               | VH     | D    | RF | JH | CDR3(aa)              | Length | Vλ    | Jλ | CDR3 (aa)    | Length | Poly       | HEp2 | Staining |
| mnWAS04p 55 # | 3-9    | 3-16 | 1  | 4  | DHLRLGELSSFDY         | 13     | 3-25  | 2  | QSADSSGTYVV  | 11     |            |      |          |
| mnWAS04p 67   | 4-61   | 3-10 | 3  | 6  | VGTMVRGIPFYGMDV       | 15     | 1-36  | 2  | AAWDDSLNGVV  | 11     | -          | -    | -        |
| mnWAS04p 69 # | 3-30   | 6-19 | 2  | 4  | LYSSGRFDY             | 9      | 3-25  | 1  | QSADSSGTYV   | 10     |            |      |          |
| mnWAS04p 71   | 4-34   | /    | /  | 6  | GTYYYYYGMVDV          | 11     | 1-51  | 2  | GTWDSLSAGV   | 11     | -          | -    | -        |
| mnWAS04p 72   | 4-59   | 3-22 | 2  | 6  | LSYYDSSGYPPSYYYYYGMDV | 22     | 3-1   | 2  | QAWDSIVV     | 8      | -          | +    | -        |
| mnWAS04p 73   | 3-23   | 3-3  | 2  | 5  | IEGNYDFWSGYPLENWFDP   | 19     | 3-1   | 1  | QAWDSSTGV    | 9      | -          | -    | -        |
| mnWAS04p 78   | 3-30   | 2-2  | 3  | 6  | STEDIVVPAAPAVHYGMDV   | 23     | 1-47  | 2  | AAWDDSLSGAGV | 12     | -          | +    | -        |
| mnWAS04p 89   | 4-b    | 3-22 | 1  | 4  | DLWLDYDNYFDY          | 12     | 2-23  | 1  | CSYAGSSTYV   | 10     | -          | +    | C        |
| mnWAS04p 93   | 4-61   | 6-13 | 3  | 4  | TLHTAAAGIHY           | 11     | 1-44  | 2  | AAWDDSLNGLV  | 12     | -          | -    | -        |
| mnWAS04p 96   | 1-18   | 3-22 | 2  | 3  | GSTYDSSGYFPDAFDI      | 17     | 2-11  | 2  | CSYAGSYTLV   | 10     | -          | -    | -        |
| mnWAS04p 66   |        |      |    |    |                       |        | 1-51  | 2  | GTWDSLSAGAV  | 12     |            |      |          |
| mnWAS04p 76   |        |      |    |    |                       |        | 3-1   | 1  | QAWDSSTYV    | 9      |            |      |          |

RF, reading frame; #, antibody failed to be expressed; -, non-reactive; +, reactive;

C, diffuse cytoplasmic staining; N, nuclear staining; F, cytoplasmic fibers
